# Supplementary material for: Strengths and Difficulties Questionnaire: internal validity and reliability for New Zealand preschoolers
Source: PubMed Central journal article supplement — BMJ Open. 2018 Apr 21;8(4):e021551. doi: 10.1136/bmjopen-2018-021551 (PMC5914702; doi:10.1136/bmjopen-2018-021551), 2018-04-21
Supplement: bmjopen-2018-021551.draft_revisions.pdf [file bmjopen-2018-021551.draft_revisions.pdf]

# BMJ Open

BMJ Open is committed to open peer review. As part of this commitment we make the peer review history of every article we publish publicly available.

When an article is published we post the peer reviewers' comments and the authors' responses online. We also post the versions of the paper that were used during peer review. These are the versions that the peer review comments apply to.

The versions of the paper that follow are the versions that were submitted during the peer review process. They are not the versions of record or the final published versions. They should not be cited or distributed as the published version of this manuscript.

BMJ Open is an open access journal and the full, final, typeset and author-corrected version of record of the manuscript is available on our site with no access controls, subscription charges or pay-per-view fees (<http://bmjopen.bmj.com>).

If you have any questions on BMJ Open's open peer review process please email [info.bmjopen@bmj.com](mailto:info.bmjopen@bmj.com)

# BMJ Open

## Strengths and Difficulties Questionnaire: internal validity and reliability for New Zealand pre-schoolers

|                               |                                                                                                                                                                                                                                                                                                                                                                                                                                                                       |
|-------------------------------|-----------------------------------------------------------------------------------------------------------------------------------------------------------------------------------------------------------------------------------------------------------------------------------------------------------------------------------------------------------------------------------------------------------------------------------------------------------------------|
| Journal:                      | <i>BMJ Open</i>                                                                                                                                                                                                                                                                                                                                                                                                                                                       |
| Manuscript ID                 | bmjopen-2018-021551                                                                                                                                                                                                                                                                                                                                                                                                                                                   |
| Article Type:                 | Research                                                                                                                                                                                                                                                                                                                                                                                                                                                              |
| Date Submitted by the Author: | 08-Jan-2018                                                                                                                                                                                                                                                                                                                                                                                                                                                           |
| Complete List of Authors:     | Kersten, Paula; University of Brighton, School of Health Sciences<br>Vandal, Alain; AUT University, Department of Biostatistics and Epidemiology; Counties Manukau District Health Board, Ko Awatea Health Intelligence and Informatics<br>Elder, Hinemoa; Te Whare Wānanga o Awanuiārangī, School of Graduate Studies<br>McPherson, Kathryn; Health Research Council of New Zealand; AUT University, Centre for Person Centred Research, School of Clinical Sciences |
| Keywords:                     | Strengths and Difficulties Questionnaire, validity, reliability, Rasch, pre-school                                                                                                                                                                                                                                                                                                                                                                                    |
|                               |                                                                                                                                                                                                                                                                                                                                                                                                                                                                       |

SCHOLARONE™  
Manuscripts

Peer Review Only

# Strengths and Difficulties Questionnaire: internal validity and reliability for New Zealand pre-schoolers

Paula Kersten<sup>1</sup>, Alain C Vandal<sup>2</sup>, Hinemoa Elder<sup>3</sup>, Kathryn M McPherson<sup>4,5</sup>

<sup>1</sup> School of Health Sciences, University of Brighton, UK

<sup>2</sup> Department of Biostatistics and Epidemiology, AUT University, New Zealand & Ko Awatea Health Intelligence and Informatics, Counties Manukau District Health Board, New Zealand

<sup>3</sup> Te Whare Wānanga o Awanuiārangi, Auckland, New Zealand.

<sup>4</sup> The Health Research Council of New Zealand

<sup>5</sup> Centre for Person Centred Research, School of Clinical Sciences, AUT University, New Zealand.

## Corresponding author

Professor Paula Kersten, School of Health Sciences, University of Brighton, Westlaine House, Falmer, Brighton BN1 9PH. [p.kersten@brighton.ac.uk](mailto:p.kersten@brighton.ac.uk). Tel +44 1273 643483. Fax: +44 1273 644010.

## Abstract

**Objectives:** This paper examines the internal construct validity, internal consistency and cross-informant reliability of the Strengths and Difficulties Questionnaire (SDQ) in a New Zealand pre-school population across four ethnicity strata (New Zealand European, Māori, Pasifika, Asian).

**Design:** Rasch analysis was employed to examine internal validity on a subsample of 1,000 children. Internal consistency (n=29,075) and cross-informant reliability (n=17,006) was examined using correlations, intraclass correlation coefficients and Cronbach's Alpha on the full sample available for such analyses.

**Setting & participants:** Data was utilised from a national SDQ database provided by the funder, pertaining to New Zealand domiciled children aged 4 and 5, and scored by their parents and teachers.

**Results:** The five subscales do not fit the Rasch model (as indicated by the overall fit statistics); contain items that are biased (differential item functioning) by key variables, suffer from a floor and ceiling effect and have unacceptable internal consistency. After dealing with differential item functioning the Total Difficulty scale does fit the Rasch model and has good internal consistency. Parent/teacher inter-rater reliability was unacceptably low for all subscales.

**Conclusion:** The five SDQ subscales are not valid and not suitable for use in their own right in New Zealand. We have provided a conversion table for the Total Difficulty scale, which takes account of bias by ethnic group. Clinicians should use this conversion table in order to reconcile differential item functioning by culture in final scores. It is advisable to use both parents and teachers' feedback when considering children's needs for referral of further assessment. Future work should examine if validity is impacted by different language versions used in the same country.

## Keywords

Strengths and Difficulties Questionnaire, validity, reliability, Rasch, pre-school

### Strengths and limitations of this study

- A key strength of this study is the inclusion of all 4 and 5 year old children in New Zealand for whom an SDQ assessment was available in 2011, resulting in our ability to assess the validity of the tool at the population level and with sufficient power to make sound conclusions.
- We excluded 39% of data as we had some concerns about their quality (it being incomplete or containing multiple inconsistencies).
- We were unable to assess DIF by other key variables that may affect validity, e.g. first language or country of birth, as such data were not available.
- Future work should examine if validity is impacted by different language versions used (in the same country).

### Funding

This work was supported by the Ministry of Health of New Zealand (grant number 341088). The funding body has not had input into the design, data collection, analysis, interpretation of data, in the writing of the manuscript, nor in the decision to submit the manuscript for publication.

### Acknowledgements

We thank the funder for supporting the study.

## Introduction

The Strengths and Difficulties Questionnaire for parents (SDQ-P) and for teachers (SDQ-T) is a tool used worldwide to screen pre-school children's psychosocial attributes (positive and negative behaviours).<sup>1 2 3 4</sup> It consists of 25 items, making up five subscales: Emotional Symptoms, Conduct Problems, Hyperactivity, Peer Problems, and Prosocial Behaviour.<sup>1 2</sup>

The structural validity of the SDQ has been extensively researched using factor analysis (e.g. by<sup>5-7</sup>). A recent systematic review found acceptable to good evidence for the 5-factor SDQ structure, when confirmatory factor analysis (CFA) had been used.<sup>8</sup> A different approach to examining structural validity can be achieved by examining if each of the subscales are unidimensional and fit the Rasch model (i.e. examining internal construct validity).<sup>9</sup> Like CFA, Rasch analysis is a confirmatory approach to examining if items belong to the subscales under investigation. However, there are known limitations of using factor analysis on ordinal scales, including its parametric basis and the emergence of 'difficulty factors', which may spuriously indicate multidimensionality.<sup>10</sup> In addition, factor analysis does not allow detailed investigation of item function regard to targeting, differential item functioning and local dependency between items, whereas Rasch analysis includes such assessments.<sup>11</sup>

Internal consistency of the SDQ-P subscales has been reported in many studies and synthesised in a systematic review.<sup>8</sup> The sample size-weighted average Cronbach's alphas ( $\alpha$ ) for the five subscales was below the threshold of 0.70 (implying inadequate internal consistency); and for the Difficulty scale  $\alpha$  was 0.79 (acceptable for group comparisons but not for individual use).

Inter-rater reliability of SDQ subscales between two parents and between two teachers has previously been found to be acceptable when correlation coefficients were used (between 0.42 and 0.64 for parents and between 0.59 and 0.81 for teachers).<sup>12</sup> Other studies have examined scores between different types of informants (e.g. parent and teacher). The systematic review showed that the sample

1  
2  
3 size-weighted average correlation coefficients generated from these studies were weak to moderate  
4 (between 0.25 and 0.45).<sup>8</sup>  
5  
6  
7

8  
9 The validity and reliability of the SDQ have not previously been examined in New Zealand, which is  
10 a country with a sizeable indigenous population (Māori, 15.4%) and immigrant population (25.2%  
11 born overseas).<sup>13</sup> New Zealand is a multi-cultural society, impacting upon values, ways of living and  
12 languages spoken. It therefore cannot be assumed that measures capturing psychological constructs  
13 will have cultural equivalence.<sup>14 15</sup> Indeed, a New Zealand qualitative study has shown that parents  
14 from Māori, Pacific Island, Asian, and new immigrant groups questioned the cultural validity of the  
15 SDQ.<sup>16</sup> Cultural equivalence therefore needs further investigation.  
16  
17  
18  
19  
20  
21  
22  
23

24 This study aimed to examine the reliability between parents and teachers (cross-informant reliability),  
25 internal construct validity and cultural equivalence of the SDQ in a New Zealand pre-school  
26 population across different ethnicity strata. We hypothesised that the SDQ subscales and the  
27 Difficulty scale would i) have cross-informant reliability (with consistency in scores by parents and  
28 teachers); ii) fit the Rasch model (demonstrating unidimensionality and internal construct validity),  
29 and iii) have cultural equivalence across ethnic strata (demonstrated by an absence of item differential  
30 function or DIF).  
31  
32  
33  
34  
35  
36  
37  
38  
39

## 40 **Methods**

### 41 **Study design and sample**

42  
43 The study utilised SDQ data gathered during the New Zealand Before School Check (B4SC),<sup>3</sup> which  
44 takes place when the child is aged 4 or 5. Permission to use the full, de-identified 2011 national SDQ  
45 dataset for 4 and 5 year olds from the Ministry of Health was provided by the B4SC Governance  
46 Board (n=51,251). Data were included if responses to individual item responses had been entered (as  
47 opposed to only total scores). Cases were excluded for District Health Board with fewer than 15% of  
48 complete datasets as their data quality was in doubt, and if scores entered were all zero (deemed  
49  
50  
51  
52  
53  
54  
55  
56  
57  
58  
59  
60

1  
2  
3 suspicious as the Prosocial subscale is scored in the opposite direction from the other subscales). In  
4 addition, children with ethnicity classed as Other European and Other were excluded as these groups  
5 would have contained a very broad number of countries from which children or their families would  
6 have hailed, potentially biasing our analysis (especially for differential item functioning by ethnic  
7 groups, see below). In total 29,075 cases remained in the parents' dataset (51.3% boys; 68% aged 4;  
8 57% NZ European, 23% Māori, 12% Pasifika 8% Asian); 17,006 remained for the parent-teacher  
9 cross-informant reliability analysis.

10  
11 Fit to the Rasch model is considered acceptable when the observed data fit the predetermined Rasch  
12 model,<sup>9,17</sup> traditionally examined with fit statistics (e.g. the item-trait interaction chi-square). A non-  
13 significant chi-square indicates fit to the Rasch model. However, power increases with large samples,  
14 which inflates the chi-square and results in negligible small differences appearing as a statistically  
15 significant misfit between the data and the model.<sup>18,19</sup> Therefore, our analysis was carried out on a  
16 smaller sample (n=1,000), to allow examination of convergence to the Rasch model. The sample was  
17 created by randomly sampling equal numbers of people for each of the four ethnic groups (250/ethnic  
18 group).

### 19 20 21 22 23 24 25 26 27 28 29 30 31 32 33 34 **Instruments**

35  
36 The SDQ consists of 25 items, each with three response options: not true, somewhat true, and  
37 certainly true. The four SDQ subscales reflecting problematic behaviours or emotions (Emotional  
38 Symptoms, Conduct Problems, Hyperactivity, Peer Problems) contain 15 positively worded items and  
39 five negatively worded items.<sup>1,2</sup> Positively worded items are reverse scored (in New Zealand this is  
40 done on data entry), thus higher subscale scores denote greater problems. Scores from these four  
41 subscales are also summed to give an overall Difficulty score ranging from 0-40. The five items  
42 making up the Prosocial Behaviour subscale are positively worded and higher scores denote better  
43 social behaviour.

### 44 45 46 47 48 49 50 51 52 53 54 **Data analysis**



1  
2  
3 Cross-informant reliability (between parents and teachers) was assessed for those cases for which both  
4 parent and teacher SDQ data were available. The Intraclass Correlation Coefficient (ICC) is the  
5 preferred statistical technique and was used.<sup>20 21</sup> However, as many studies of the SDQ have used  
6 correlations<sup>22</sup> we will also present those.  
7  
8  
9

10  
11  
12 Each SDQ subscale and the Difficulty scale were fitted to the Rasch Model to examine fit, using  
13 RUMM2030 software.<sup>23</sup> Fit was considered acceptable if there was a non-substantial deviation of  
14 individual items and respondents from the Rasch model (individual item and person Fit Residuals  
15 should be within the range of +/- 2.5, the average Fit Residual statistics should be close to a mean of  
16 zero and standard deviation of one, the item chi-squares should be non-significant). In addition, we  
17 used the Root Mean Square Error of Approximation (RMSEA) to examine fit, with RMSEA<0.02  
18 suggesting data fit the Rasch model (Box 1).<sup>19</sup>  
19  
20  
21  
22  
23  
24  
25  
26  
27

28 Log-transformed item scores generated from the response choices should reflect the increasing or  
29 decreasing latent trait to be measured (threshold ordering). When a given level of problems is not  
30 confirmed by the expected response option to an item, disordered thresholds are observed.  
31  
32  
33

34 Disordering is only considered statistically significant if the 95% confidence intervals of the threshold  
35 locations do not overlap. When significant disordering are observed response categories can be  
36 combined.  
37  
38  
39  
40  
41

42 An assumption of the Rasch model is that the answers to one item should not be dependent on the  
43 responses to another item, conditional upon the trait being measured. This local independence is  
44 examined by exploring the correlations between items' residuals, which should not be more than 0.20  
45 above the average residual correlation.<sup>24</sup> If locally dependent items are observed they can be  
46 combined into a testlet, a bundle of items that share a common stimulus.<sup>25</sup>  
47  
48  
49  
50  
51  
52  
53

54 The Rasch model expects that each item is invariant (unbiased) across key groups (e.g. ethnicity or  
55 gender),<sup>26 27</sup> examined statistically with an Analysis of Variance (ANOVA) and visually by examining  
56  
57  
58  
59  
60

1  
2  
3 the Item Characteristic Curves (ICC). Variance (Differential Item Functioning, DIF) can be uniform;  
4 the bias is present consistently across the trait. For example, uniform DIF by ethnic group implies that  
5 item difficulty is different for individual ethnic groups across the trait even though their underlying  
6 level of problems is the same. DIF can also be non-uniform; the bias is not consistent across the trait.  
7  
8 DIF analysis is affected by large sample sizes with non-significant DIF showing as significant, hence  
9 inspection of ICCs is also important. When uniform DIF is observed two strategies can be employed.  
10  
11 First, DIF items (if present in >1 item) can be combined into a testlet to examine if DIF is cancelled  
12 out at the test level; second, the item can be split by the variable for which DIF is observed. In our  
13 analysis we considered the final solution to be the one with the best improvements in fit statistics.  
14  
15  
16  
17  
18  
19  
20  
21  
22

23 Another key assumption of the Rasch model is that a scale must be unidimensional. This is examined  
24 by creating two subsets of items, identified by a principal component analysis of the item residuals,  
25 with those loading negatively forming one set and those positively loading the second set.<sup>28</sup> An  
26 independent t-test is used to compare estimates derived from the two subtests for each respondent.  
27  
28 When fewer than 5% of the t-tests are significant (or the 95% confidence interval of t-tests includes  
29 5%) unidimensionality is supported.<sup>28 29</sup>  
30  
31  
32  
33  
34  
35

36 Targeting of the subscales to the population was examined with person-item-threshold maps.  
37  
38  
39

40 Internal consistency was examined with Cronbach's Alpha and Person Separation Index (PSI)  
41 statistics. PSI is an indicator of the number of statistically different strata (groups) that the test can  
42 identify in the sample.<sup>30</sup> Interpretation of the PSI is similar to Cronbach's Alpha with values  $\geq 0.70$   
43 suitable for group comparisons and  $\geq 0.85$  for individual clinical use. However, Cronbach's Alpha can  
44 only be calculated when there are no missing data and are not considered robust with skewed data.<sup>31</sup>  
45  
46 Therefore, we present PSI and Cronbach's Alpha in summary tables as well as the number of groups  
47 the subscale is able to discriminate between.<sup>32</sup>  
48  
49  
50  
51  
52  
53  
54  
55  
56  
57  
58  
59  
60

Ethical approval was obtained from the New Zealand Health and Disability Ethics Committee (Northern A, NTY/12/04/028/AM05) and the Auckland University of Technology's Ethics Committee (12/163).

## Results

### **Cross-informant reliability**

Cross-informant reliability between parent and teachers as measured by correlations was generally poor (all  $<0.5$ , mean 0.28) and ICCs (all  $<0.6$ , mean 0.13). Cross-informant reliability was better in the Hyperactivity subscale, and worst in the Prosocial subscale; better for NZ European and worst for Pasifika children (table 1).

### **Internal validity & cross-cultural equivalence**

Table 2 displays results from the Rasch analysis.

#### ***Emotional Symptoms subscale***

All items in this subscale had ordered thresholds, items were locally independent and the subscale was unidimensional. Person fit was adequate with a mean person fit residual reasonably close to 0 and the SD below 1.4 (Table 2: analysis 1). However, overall fit to the Rasch model was unsatisfactory (RMSEA  $>0.02$ ). PSI was below zero and Cronbach's Alpha ( $\alpha$ ) 0.15. All item fit residuals were within the acceptable range of -2.5 to 2.5; however, 4 out of 5 item chi-square values were statistically significant, indicating misfit.

There was statistically significant uniform DIF by ethnicity in items 16 and 24, which was confirmed by visual inspection of the ICCs (Figure 1). Items 16 and 24 were combined into a testlet. This resulted in poorer person fit and similar RMSEA values (0.072). We therefore split these items by

1  
2  
3 ethnic groups instead, creating unique items for NZE, Māori, Asian and Pasifika peoples, resulting in  
4  
5 11 items for the subscale. This improved overall fit to the Rasch model, however, the RMSEA was  
6  
7 still greater than the acceptable value of 0.02 and internal consistency unacceptably low (Table 2:  
8  
9 analysis 2).

10  
11  
12 After items were split all item fit residuals were within range, although two still had statistically  
13  
14 significant chi-square values (items 24NZE and item 8). Table 3 shows that the easiest item to endorse  
15  
16 is item 16 and the hardest to endorse is item 13. The split item locations show that for children with  
17  
18 the same level of emotional problems item 16 is more readily endorsed when they are Māori and less  
19  
20 readily endorsed when they are Pasifika (difference of 0.42 logits). Item 24 is endorsed more readily  
21  
22 by parents of Asian than NZE children (difference of 0.49 logits). Figure 2 displays the targeting of  
23  
24 the subscale to the population, clearly demonstrating the large number of extreme cases.  
25  
26  
27  
28

### 29 ***Conduct Problems subscale***

30  
31 Conduct Problems item thresholds were ordered, items were locally independent, person fit and  
32  
33 unidimensionality were acceptable. However, overall fit to the model was unsatisfactory (RMSEA  
34  
35 >0.02, Table 2: analysis 3). Internal consistency was poor (PSI 0.10,  $\alpha$  0.65) with the subscale being  
36  
37 able to discriminate between three strata.

38  
39 Item fit residuals were within acceptable range though two had significant chi-squares (items 5 and  
40  
41 18).

42  
43 Statistically significant DIF by ethnicity was present for item 12 and by gender for item 7. These two  
44  
45 items were split by ethnicity and gender respectively (Table 2: analysis 4), resulting in satisfactory fit  
46  
47 residuals, 1 item with a significant chi-square, significant improvement in RMSEA (0.03) but poor  
48  
49 internal consistency (PSI=0.11, splitting items leads to missing data and  $\alpha$  cannot be calculated).

50  
51 The easiest item to endorse was item 5 and the hardest item 12 (Table 3). The split item locations  
52  
53 show that for children with the same level of conduct problems item 12 is more readily endorsed  
54  
55 when they are Pasifika and less readily endorsed when they are NZE (difference of 1.22 logits). Item  
56  
57  
58  
59

1  
2  
3 7 is endorsed more readily by parents of boys than girls (difference of 0.32 logits). Targeting showed  
4 a floor effect (Figure 2).  
5  
6  
7

### 9 ***Hyperactivity subscale***

10 Ordered thresholds, local independence, person fit and unidimensionality were observed for the  
11 Hyperactivity subscale, however, overall fit to the model and internal consistency was unsatisfactory  
12 (RMSE >0.02; PSI 0.30,  $\alpha$  0.48; subscale discriminates between 3 strata, Table 2: analysis 5). Item fit  
13 residuals were out of range for item 21 and item 25 had a significant chi-square. Uniform DIF was  
14 statistically significant by ethnicity in two items (15 and 21). These items were therefore split by  
15 ethnicity. This improved fit to the Rasch model (Table 2: analysis 6) and better fit than when these 2  
16 items were combined into a testlet. Item fit residuals were within acceptable range of -2.5/+2.5, only 1  
17 item had a significant item chi-square statistic (Table 3), and RMSEA was close to 0.02. However,  
18 internal consistency remained poor (PSI=0.31). The easiest item to endorse was item 15 (for Asian  
19 children) and the hardest item 10. The split item locations show that for children with the same level  
20 of hyperactivity problems item 15 is more readily endorsed when they are Asian and less readily  
21 endorsed when they are NZE (difference of 0.52 logits). Item 21 is endorsed more readily by parents  
22 of NZE children than Pasifika children (difference of 0.47 logits, Table 3). The targeting map showed  
23 a floor effect (Figure 2).  
24  
25  
26  
27  
28  
29  
30  
31  
32  
33  
34  
35  
36  
37  
38  
39  
40

### 41 ***Peer problems subscale***

42 Ordered thresholds, local independence, person fit and unidimensionality were observed. However,  
43 overall fit to the Rasch model and internal consistency were unsatisfactory (RMSEA >0.02; PSI  
44 negative value,  $\alpha$  0.51, the subscale is able to discriminate between 2 strata, Table 2: analysis 7). Item  
45 fit residuals were acceptable, although two items had significant chi-squares. One item (23) displayed  
46 uniform DIF by ethnicity. After splitting this item by ethnicity fit improved; all item fit residuals were  
47 within range (item 14 chi-square was borderline statistically significant), RMSEA was close to 0.02.  
48 PSI values remained negative, however (Table 2: analysis 8). The easiest item was item 23 (for Asian  
49  
50  
51  
52  
53  
54  
55  
56  
57  
58  
59  
60

1  
2  
3 children) and the hardest item 14. Item 23 was easier for Asian children and hardest for NZE children  
4 (difference of 1.10 logits, Table 3). Targeting showed a significant floor effect (Figure 2).  
5  
6  
7

### 8 9 ***Prosocial subscale***

10 The subscale met the requirements for threshold ordering, local independence, person fit and  
11 unidimensionality. Overall fit to the Rasch model and internal consistency were unsatisfactory  
12 (RMSEA >0.02; PSI negative values,  $\alpha$  0.29, subscale able to discriminate between 2 strata, Table 2:  
13 analysis 9). Item fit residuals were within the -2.5/+2.5 range, though two had significant item chi-  
14 square statistics. There was no DIF. Item 17 was the easiest to endorse; item 4 was the hardest to  
15 endorse. A ceiling effect was observed in the person-item-threshold map (Figure 2).  
16  
17  
18  
19  
20  
21  
22  
23

### 24 25 ***Difficulty scale***

26 Two items had disordered thresholds, however, this was not statistically significant and item response  
27 categories did not need to be combined. Some local dependency was present in 2 item pairs.  
28 Unidimensionality was observed (Table 2: analysis 10). Five item fit residuals were out of the  
29 acceptable range of -2.5/+2.5 and four items showed uniform DIF by ethnicity (items 12, 16, 21 and  
30 23). To examine if DIF was present at the test level these items were combined into a testlet. This  
31 resulted in an absence of DIF, however, one item pair remained locally dependent (items 2 and 10). A  
32 second testlet was created to deal with this local dependency. The resulting scale was unidimensional,  
33 with locally independent items (Table 2: analysis 11). The RMSEA was within range suggesting  
34 overall fit to the Rasch model. Internal consistency was good (PSI 0.71,  $\alpha$  0.77, the scale was able to  
35 discriminate between 6 distinct strata). The fit residual for one item was slightly out of range (item 15,  
36 -2.777), however, given the negative value of this residual this indicates redundancy rather than misfit  
37 and the item was therefore retained. The easiest item to endorse was item 15, the hardest item 14. The  
38 person-item threshold map shows a normal distribution, although this is located to the left of the item  
39 locations on the latent trait. A conversion table was produced, which can be used to convert the raw  
40 ordinal score to an interval scale (Table 4).  
41  
42  
43  
44  
45  
46  
47  
48  
49  
50  
51  
52  
53  
54  
55  
56  
57  
58  
59  
60

## Discussion

This study has shown that the SDQ items response categories work well, however, the five subscales diverge significantly from the Rasch model and four include items that are biased by key variables (ethnicity having the greatest contribution), raising questions about cultural equivalence. The five subscales suffer from a floor and ceiling effect and their internal consistency statistics are well below the acceptable range. By contrast, the total Difficulty scale, which combines the four subscales capturing children's problems, is unidimensional, fits the Rasch model (after dealing with DIF and local dependency) and has internal consistency sufficient to distinguish between six groups of children. The study has also shown that parents and teachers score children in their care differently. Thus, all three study hypotheses are rejected. This section will discuss our findings in terms of fit to the Rasch model, internal consistency, cultural equivalence and cross-informant reliability.

### Fit to the Rasch model

The total Difficulty scale did fit the Rasch model, after dealing with four DIF items and two locally dependent items. This scale has good internal consistency and is able to discriminate between six groups of children on the latent trait. We observed the population distribution, whilst following a normal pattern, was to the left of the item locations on the latent trait. Thus, the precision of person estimates at the lower of the scale will not be as good as for those at the higher end of the scale. However, the SDQ is used for screening and arguably precise measurement at the lower end is not needed, since all one needs to establish is that the child does not need to be referred for further assessment or intervention. As we achieved fit to the Rasch model we were able to provide a conversion table which can be used by clinicians to convert the raw ordinal score to more accurate interval level and which takes account of DIF.

### **Internal consistency**

The 5 subscales are relatively short, which affects internal consistency and the subscales' ability to make fine distinctions between groups of people on the underlying trait.<sup>20</sup> In addition, there was significant divergence between the PSI and Cronbach's alpha statistics, with PSI being much smaller than alpha. This divergence can be explained by the way these statistics are calculated. The calculation of Cronbach's alpha assumes all standard errors (SEs) for individuals are the same, making it not a very robust statistics for skewed data.<sup>31</sup> This results in relatively high values even in the presence of extreme scores and the Cronbach alpha values are therefore meaningless for SDQ data. This has not been raised as an issue in the SDQ literature, indeed, Cronbach's Alpha values are widely reported as satisfactory.<sup>33</sup> In Rasch analysis the SE for every individual is estimated and the calculation of the PSI statistic takes these into account. Since SEs are largest for people with extreme scores, PSI will be smaller than the Cronbach's Alpha as observed in our skewed data. However, the purpose of the SDQ is to identify those children who would benefit from further assessment or intervention. Thus, the fact we observed a floor and ceiling effect is not necessarily problematic.

### **Cultural equivalence**

One quantitative study has examined measurement invariance between British Indian and British white children using multi-group confirmatory factor analyses<sup>34</sup> and demonstrated evidence of acceptable fit across ethnicity.<sup>34</sup> However, ours is the first study to examine bias by ethnicity at the item level and found lack of cultural equivalence. DIF (especially by ethnicity) was found for all the four subscales measuring problems, suggesting there are a number of questions to which parents respond differently despite overall scoring the same amount of problems on the trait being measured. If DIF is ignored it could over- or underestimate the child's difficulties since the difficulty of the item varies by ethnic group. Our study is unable to assess why such DIF occurs, since the study drew on secondary data. However, we can pose some possible factors that may have impacted upon this, as discussed below.



1  
2  
3 Our recent qualitative study suggests there is variation in the way the SDQ is administered – some  
4 parents complete the tool by themselves and others receive support from nurses, possibly impacting  
5 on the way questions are interpreted.<sup>16</sup> In addition, New Zealand pre-school parents from Māori,  
6 Pacific Island, Asian, and new immigrant groups questioned the cultural validity of the SDQ.<sup>16</sup>  
7  
8 Respondents in a qualitative study exploring the SDQ in Aboriginal community-controlled health  
9 services reported that the use of a questionnaire as opposed to a general conversation or interview was  
10 deemed culturally inappropriate and that inter-relationships with peers were considered of less  
11 importance than relationships with family and participants.<sup>35</sup>  
12  
13  
14  
15  
16  
17  
18  
19

20 There are 85 different language versions available from the Youth in Mind website, though not one in  
21 Te Reo Māori (<http://www.sdqinfo.org/>). Translations and adaptations are not permitted without the  
22 involvement of that study team, which provides confidence in the robustness of translations.  
23  
24 However, for our study we do not know if respondents were offered the SDQ in the language of their  
25 choice as such data are not collected as part of the B4SC. The literature includes six studies, which  
26 examined SDQ translations, demonstrating some issues with these.<sup>8</sup> Using a language version that is  
27 not understood by respondents will affect validity,<sup>36</sup> which may have occurred here.  
28  
29  
30  
31  
32  
33  
34  
35

36 It is possible that poor literacy impacts on answering the SDQ, as found by others.<sup>37 38</sup> In New  
37 Zealand there are many people with poorer than average literacy skills.<sup>39</sup> In addition, 18.6% of the  
38 New Zealand population report speaking two or more languages, the majority of these were born  
39 overseas (60.4%) and many of these will have English as their second language.<sup>40</sup>  
40  
41  
42  
43  
44  
45

### 46 **Cross-informant reliability**

47 Cross-informant reliability was examined with ICC's which were well below the acceptable cut off  
48 value of 0.6 (the mean in our study was 0.126). However, some argue that correlation coefficients can  
49 be used in the assessment of cross-informant reliability of the SDQ since parents and teachers make  
50 SDQ ratings based on different sources of information.<sup>1 33</sup> Our systematic literature review found  
51 weighted averages of coefficients between different informants ranged from 0.24 to 0.45,<sup>8</sup> similar to  
52  
53  
54  
55  
56  
57  
58  
59  
60

1  
2  
3 findings by others (range 0.26 to 0.47).<sup>33</sup> In our study the mean correlation coefficient was 0.28,  
4  
5 meaning only 8% of the variance can be explained by scores from different informants. This implies  
6  
7 the importance of taking into account the views of both parents and teachers when making a decision  
8  
9 for onward referral, a practice that is not commonplace in New Zealand.<sup>41</sup>  
10

11  
12 A key strength of this study is the inclusion of all 4 and 5 year old children in New Zealand for whom  
13  
14 an SDQ assessment was available in 2011, resulting in our ability to assess the validity of the tool at  
15  
16 the population level and with sufficient power to make sound conclusions. However, we excluded  
17  
18 39% of data as we had some concerns about their quality (it being incomplete or containing multiple  
19  
20 inconsistencies). In addition, we were unable to assess DIF by other key variables that may affect  
21  
22 validity, e.g. first language or country of birth, as such data were not available.  
23  
24  
25

26 In conclusion, the total Difficulty scale is internally valid and has acceptable internal consistency.  
27  
28 Clinicians should use the conversion table as this takes account of bias by ethnic group. The  
29  
30 5 subscales are not valid and not suitable for use in their own right in New Zealand. Since consistency  
31  
32 of scores between parents and teachers was poor it is advisable to use both parents and teachers'  
33  
34 feedback when considering children's needs for referral of further assessment. Future work should  
35  
36 examine if validity is impacted by different language versions used (in the same country).  
37  
38  
39  
40  
41  
42  
43  
44  
45  
46  
47  
48  
49  
50  
51  
52  
53  
54  
55  
56  
57  
58  
59  
60

1  
2  
3  
4  
5  
6  
7  
8  
9  
10  
11  
12  
13  
14  
15  
16  
17  
18  
19  
20  
21  
22  
23  
24  
25  
26  
27  
28  
29  
30  
31  
32  
33  
34  
35  
36  
37  
38  
39  
40  
41  
42  
43  
44  
45  
46  
47  
48  
49  
50  
51  
52  
53  
54  
55  
56  
57  
58  
59  
60

**Figure 1.** Item Characteristics Curves for items from the Strengths and Difficulties  
Questionnaire (parents, n=1,000)

For peer review only

1  
2  
3 **Figure 2.** Person-item-threshold maps Strengths and Difficulties Questionnaire (parents,  
4  
5 n=1,000)  
6  
7  
8  
9  
10  
11  
12  
13  
14  
15  
16  
17  
18  
19  
20  
21  
22  
23  
24  
25  
26  
27  
28  
29  
30  
31  
32  
33  
34  
35  
36  
37  
38  
39  
40  
41  
42  
43  
44  
45  
46  
47  
48  
49  
50  
51  
52  
53  
54  
55  
56  
57  
58  
59  
60

For peer review only

**Box 1.** Calculation of Root Mean Square Error of Approximation (RMSEA)

---

In Rasch analysis, RMSEA is calculated as follows:

$$\text{RMSEA} = \sqrt{\left( \frac{(\chi^2/\text{df}) - 1}{(N - 1)} \right), 0}^{19}$$

*$\chi^2$  is the item-trait interaction chi-square (obtained from the analysis within the Rasch software),*

*df is its degrees of freedom*

*N is the sample size.*

*Notice that the RMSEA has an expected value of zero when the data fit the model. Overfit of the data to the model,  $\chi^2/\text{df} < 1$ , is ignored. For a given  $\chi^2$ , RMSEA decreases as sample size (N) increases.*

---

**Table 1.** Intraclass correlation coefficients SDQ subscales, overall and by ethnicity  
(n=17,006)

| Variable                  | Ethnicity |       |                 |          |       |
|---------------------------|-----------|-------|-----------------|----------|-------|
|                           | Overall*  | Māori | NZ<br>European* | Pasifika | Asian |
|                           | r         | r     | r               | r        | r     |
| Valid N                   | 17056     | 2677  | 10735           | 1144     | 1169  |
| Mean item correlations    | 0.282     | 0.237 | 0.315           | 0.130    | 0.210 |
| Minimum item correlations | 0.199     | 0.151 | 0.220           | -0.009   | 0.055 |
| Maximum item correlations | 0.418     | 0.358 | 0.447           | 0.275    | 0.377 |
|                           | ICC       | ICC   | ICC             | ICC      | ICC   |
| Emotional Symptoms        | 0.126     | 0.067 | 0.186           | 0.017    | 0.098 |
| Conduct Problems          | 0.137     | 0.112 | 0.179           | 0.038    | 0.079 |
| Hyperactivity             | 0.174     | 0.136 | 0.245           | 0.050    | 0.122 |
| Peer problems             | 0.139     | 0.100 | 0.202           | 0.004    | 0.162 |
| Prosocial                 | 0.055     | 0.048 | 0.066           | 0.040    | 0.035 |
| Mean ICC                  | 0.126     | 0.093 | 0.175           | 0.030    | 0.099 |
| Minimum ICC               | 0.055     | 0.048 | 0.066           | 0.004    | 0.035 |
| Maximum ICC               | 0.174     | 0.136 | 0.245           | 0.050    | 0.162 |

1  
2  
3  
4  
5  
6  
7  
8  
9  
10  
11  
12  
13  
14  
15  
16  
17  
18  
19  
20  
21  
22  
23  
24  
25  
26  
27  
28  
29  
30  
31  
32  
33  
34  
35  
36  
37  
38  
39  
40  
41  
42  
43  
44  
45  
46  
47

**Table 2.** Fit to the Rasch model – Strengths and Difficulties Questionnaire parents (SDQ-P) (n=1,000)

| Subscales                 |                      | Item Fit Residual |                   |       | Person Fit Residual |       | Chi Square Interaction |    |         | RMSEA <sup>%</sup> | Internal consistency <sup>§</sup> |                  | Unidimensionality          |
|---------------------------|----------------------|-------------------|-------------------|-------|---------------------|-------|------------------------|----|---------|--------------------|-----------------------------------|------------------|----------------------------|
| Analysis name             |                      | N                 | Mean <sup>§</sup> | SD    | Mean                | SD    | Value                  | df | P       |                    | PSI                               | α                | T-Tests (CI) <sup>§§</sup> |
|                           |                      |                   |                   |       |                     |       |                        |    |         |                    | Without extremes                  | Without extremes | % (95% CI)                 |
| <b>Emotional Symptoms</b> |                      |                   |                   |       |                     |       |                        |    |         |                    |                                   |                  |                            |
| 1                         | Initial              | 1,000             | -0.791            | 0.894 | -0.327              | 0.783 | 83.6                   | 20 | <0.0001 | 0.068              | -0.40                             | 0.15             | 0                          |
| 2                         | Split items<br>16&24 | 1,000             | -0.545            | 0.841 | -0.343              | 0.735 | 99.1                   | 41 | <0.0001 | 0.045              | -0.41                             | N/A              | 0                          |
| <b>Conduct Problems</b>   |                      |                   |                   |       |                     |       |                        |    |         |                    |                                   |                  |                            |
| 3                         | Initial              | 1,000             | 0.266             | 1.273 | -0.253              | 0.876 | 71.6                   | 20 | <0.0001 | 0.060              | 0.10                              | 0.65             | 0                          |
| 4                         | Split items<br>7&12  | 1,000             | 0.134             | 0.902 | -0.254              | 0.882 | 75.3                   | 45 | 0.003   | 0.031              | 0.11                              | -                | 0                          |
| <b>Hyper-activity</b>     |                      |                   |                   |       |                     |       |                        |    |         |                    |                                   |                  |                            |
| 5                         | Initial              | 1,000             | 0.260             | 2.348 | -0.359              | 1.147 | 97.3                   | 25 | <0.0001 | 0.06               | 0.30                              | 0.48             | 0.5 (-1.0 to 2.0)          |
| 6                         | Split<br>items 15&21 | 1,000             | 0.323             | 1.480 | -0.365              | 1.134 | 125.6                  | 69 | <0.0001 | 0.03               | 0.31                              | -                | 0.5 (-1.0 to 2.0)          |
| <b>Peer Problems</b>      |                      |                   |                   |       |                     |       |                        |    |         |                    |                                   |                  |                            |

|    |                        |       |        |       |        |       |       |     |         |      |       |      |                   |
|----|------------------------|-------|--------|-------|--------|-------|-------|-----|---------|------|-------|------|-------------------|
| 7  | Initial                | 1,000 | -0.339 | 0.868 | -0.207 | 0.719 | 69.0  | 20  | <0.0001 | 0.06 | -0.49 | 0.51 | 0                 |
| 8  | Split item             | 1,000 | -0.207 | 0.652 | -0.213 | 0.733 | 79.5  | 52  | 0.008   | 0.03 | -0.43 | -    | 0                 |
|    | 23                     |       |        |       |        |       |       |     |         |      |       |      |                   |
|    | <b>Prosocial</b>       |       |        |       |        |       |       |     |         |      |       |      |                   |
| 9  | Initial                | 1,000 | -0.075 | 1.592 | -0.319 | 1.079 | 66.6  | 20  | <0.0001 | 0.06 | -0.03 | 0.29 | 0.1 (-1.5 to 1.8) |
|    | <b>Difficulty</b>      |       |        |       |        |       |       |     |         |      |       |      |                   |
| 10 | Initial                | 1,000 | -0.448 | 1.848 | -0.248 | 1.004 | 296.3 | 180 | 0.0001  | 0.03 | 0.71  | 0.79 | 5.9 (4.6 to 7.3)  |
| 11 | Testlets               | 1,000 | -0.615 | 1.321 | -0.294 | 0.985 | 200.4 | 144 | 0.001   | 0.02 | 0.71  | 0.77 | 3.0 (1.6 to 4.4)  |
|    | DIF <sup>%%</sup>      |       |        |       |        |       |       |     |         |      |       |      |                   |
|    | items &                |       |        |       |        |       |       |     |         |      |       |      |                   |
|    | LD <sup>§§</sup> items |       |        |       |        |       |       |     |         |      |       |      |                   |

---

**Note - Indices indicative of fit:**

<sup>§</sup> Mean item and person fit residuals: should be close to 0 (and <0.4); SD close to 1 (and <1.4)

<sup>%</sup> RMSEA (Root Mean Square Error of Approximation) <0.02

<sup>§</sup> Internal consistency PSI and  $\alpha \geq 0.70$  (allows for group comparisons) and  $\geq 0.85$  (allows for individual clinical use)

<sup>§§</sup> Unidimensionality indicated if fewer than 5% of t-tests are significant (i.e. the 95% CI should include 5%)

<sup>%%</sup> DIF: Differential item Functioning

<sup>§§</sup> LD: Local Dependency



**Table 3.** Item locations (in location order) and fit statistics Strengths and Difficulties Questionnaire parents (SDQ-P) subscales (n=1,000)

| Subscale & Items                      | Location | SE    | Fit Residual | Chi Square value | df | P      |
|---------------------------------------|----------|-------|--------------|------------------|----|--------|
| <b>Emotional problems<sup>s</sup></b> |          |       |              |                  |    |        |
| 16 Māori                              | -0.871   | 0.113 | -0.226       | 2.968            | 4  | 0.5631 |
| 16 NZE                                | -0.692   | 0.124 | -0.036       | 0.60             | 3  | 0.8960 |
| 16 Asian                              | -0.538   | 0.118 | -0.101       | 0.77             | 3  | 0.8569 |
| 16 Pasifika                           | -0.450   | 0.120 | 0.911        | 0.61             | 3  | 0.8936 |
| 24 Asian                              | -0.250   | 0.124 | -0.185       | 5.13             | 3  | 0.1629 |
| 24 Māori                              | 0.010    | 0.117 | -0.737       | 9.69             | 4  | 0.0461 |
| 24 Pasifika                           | 0.024    | 0.124 | -0.002       | 11.857           | 3  | 0.0079 |
| 24 NZE                                | 0.243    | 0.127 | -1.610       | 14.095           | 3  | 0.0028 |
| 3                                     | 0.653    | 0.070 | -0.615       | 15.156           | 5  | 0.0097 |
| 8                                     | 0.908    | 0.075 | -1.970       | 21.479           | 5  | 0.0007 |
| 13                                    | 0.965    | 0.080 | -1.423       | 16.749           | 5  | 0.0050 |
| <b>Conduct Problems<sup>%</sup></b>   |          |       |              |                  |    |        |
| 5                                     | -0.985   | 0.063 | 0.011        | 15.38            | 5  | 0.0089 |
| 18                                    | -0.707   | 0.066 | -0.352       | 22.19            | 5  | 0.0005 |
| 7 Male                                | -0.594   | 0.096 | 1.209        | 7.71             | 5  | 0.1732 |
| 7 Fem                                 | -0.271   | 0.100 | 1.917        | 6.09             | 5  | 0.2975 |
| 22                                    | -0.012   | 0.072 | 0.156        | 8.49             | 5  | 0.1312 |
| 12 Pasifika                           | 0.089    | 0.143 | -0.148       | 3.527            | 5  | 0.6193 |
| 12 Māori                              | 0.339    | 0.145 | -0.512       | 5.862            | 5  | 0.3199 |
| 12 Asian                              | 0.838    | 0.202 | -0.030       | 2.344            | 5  | 0.7998 |
| 12 NZE                                | 1.304    | 0.211 | -1.049       | 3.733            | 5  | 0.5884 |
| <b>Hyperactivity<sup>s</sup></b>      |          |       |              |                  |    |        |
| 15Asian                               | -0.491   | 0.109 | -0.395       | 8.25             | 5  | 0.1432 |
| 15 Māori                              | -0.315   | 0.117 | 0.433        | 1.78             | 6  | 0.9388 |

|    |                                 |        |       |        |        |   |        |
|----|---------------------------------|--------|-------|--------|--------|---|--------|
| 1  |                                 |        |       |        |        |   |        |
| 2  |                                 |        |       |        |        |   |        |
| 3  | 21 NZE                          | -0.234 | 0.142 | 2.204  | 17.50  | 5 | 0.0037 |
| 4  | 2                               | -0.206 | 0.056 | -1.327 | 23.29  | 9 | 0.0056 |
| 5  |                                 |        |       |        |        |   |        |
| 6  | 21 Asian                        | -0.186 | 0.124 | 1.414  | 8.216  | 5 | 0.1447 |
| 7  |                                 |        |       |        |        |   |        |
| 8  | 15 Pasifika                     | -0.019 | 0.121 | 0.388  | 8.775  | 5 | 0.1184 |
| 9  |                                 |        |       |        |        |   |        |
| 10 | 15 NZE                          | 0.032  | 0.126 | -1.737 | 12.772 | 5 | 0.0256 |
| 11 |                                 |        |       |        |        |   |        |
| 12 | 21 Māori                        | 0.114  | 0.129 | 1.743  | 7.403  | 6 | 0.2852 |
| 13 |                                 |        |       |        |        |   |        |
| 14 | 21 Pasifika                     | 0.234  | 0.122 | 1.393  | 5.986  | 5 | 0.3076 |
| 15 | 25                              | 0.360  | 0.066 | 1.421  | 9.335  | 9 | 0.4070 |
| 16 |                                 |        |       |        |        |   |        |
| 17 | 10                              | 0.712  | 0.065 | -1.984 | 22.26  | 9 | 0.0081 |
| 18 |                                 |        |       |        |        |   |        |
| 19 | <b>Peer Problems %</b>          |        |       |        |        |   |        |
| 20 |                                 |        |       |        |        |   |        |
| 21 | 23 A                            | -0.968 | 0.109 | -0.571 | 1.959  | 4 | 0.7432 |
| 22 | 23 P                            | -0.870 | 0.107 | 0.307  | 4.311  | 5 | 0.5056 |
| 23 | 23 M                            | -0.217 | 0.119 | 0.038  | 5.529  | 4 | 0.2372 |
| 24 |                                 |        |       |        |        |   |        |
| 25 | 6                               | -0.026 | 0.065 | 0.526  | 10.572 | 9 | 0.3062 |
| 26 |                                 |        |       |        |        |   |        |
| 27 | 23 N                            | 0.130  | 0.154 | 0.093  | 3.548  | 3 | 0.3147 |
| 28 |                                 |        |       |        |        |   |        |
| 29 | 11                              | 0.233  | 0.066 | -1.419 | 17.787 | 9 | 0.0377 |
| 30 |                                 |        |       |        |        |   |        |
| 31 | 19                              | 0.491  | 0.071 | 0.131  | 12.305 | 9 | 0.1967 |
| 32 |                                 |        |       |        |        |   |        |
| 33 | 14                              | 1.227  | 0.084 | -0.763 | 23.501 | 9 | 0.0052 |
| 34 |                                 |        |       |        |        |   |        |
| 35 | <b>Prosocial §</b>              |        |       |        |        |   |        |
| 36 |                                 |        |       |        |        |   |        |
| 37 | 1                               | -0.487 | 0.079 | -1.530 | 18.205 | 4 | 0.0011 |
| 38 | 4                               | -0.036 | 0.073 | -0.273 | 12.624 | 4 | 0.0133 |
| 39 | 9                               | 0.000  | 0.072 | 1.092  | 6.74   | 4 | 0.1502 |
| 40 | 17                              | 0.008  | 0.071 | -1.633 | 21.52  | 4 | 0.0003 |
| 41 | 20                              | 0.515  | 0.073 | 1.972  | 7.52   | 4 | 0.1109 |
| 42 |                                 |        |       |        |        |   |        |
| 43 |                                 |        |       |        |        |   |        |
| 44 |                                 |        |       |        |        |   |        |
| 45 |                                 |        |       |        |        |   |        |
| 46 | <b>Difficulty <sup>SS</sup></b> |        |       |        |        |   |        |
| 47 | 15                              | -0.835 | 0.054 | -2.777 | 27.39  | 9 | 0.0012 |
| 48 |                                 |        |       |        |        |   |        |
| 49 | LD items <sup>%%</sup>          | -0.606 | 0.037 | -1.744 | 14.01  | 9 | 0.1221 |
| 50 |                                 |        |       |        |        |   |        |
| 51 | 5                               | -0.583 | 0.056 | -0.595 | 8.71   | 9 | 0.4645 |
| 52 |                                 |        |       |        |        |   |        |
| 53 | DIF items <sup>SS</sup>         | -0.375 | 0.031 | -2.500 | 21.03  | 9 | 0.0125 |
| 54 |                                 |        |       |        |        |   |        |
| 55 | 25                              | -0.331 | 0.061 | 0.036  | 14.05  | 9 | 0.1207 |
| 56 |                                 |        |       |        |        |   |        |
| 57 |                                 |        |       |        |        |   |        |
| 58 |                                 |        |       |        |        |   |        |
| 59 |                                 |        |       |        |        |   |        |
| 60 |                                 |        |       |        |        |   |        |

|    |    |        |       |        |       |   |        |
|----|----|--------|-------|--------|-------|---|--------|
| 1  |    |        |       |        |       |   |        |
| 2  |    |        |       |        |       |   |        |
| 3  | 24 | -0.314 | 0.058 | 0.839  | 7.44  | 9 | 0.5911 |
| 4  | 18 | -0.313 | 0.059 | -0.742 | 6.83  | 9 | 0.6553 |
| 5  |    |        |       |        |       |   |        |
| 6  | 6  | -0.137 | 0.061 | 1.137  | 4.47  | 9 | 0.8777 |
| 7  |    |        |       |        |       |   |        |
| 8  | 7  | -0.026 | 0.063 | -1.305 | 23.26 | 9 | 0.0057 |
| 9  |    |        |       |        |       |   |        |
| 10 | 11 | 0.117  | 0.067 | 0.862  | 9.76  | 9 | 0.3702 |
| 11 |    |        |       |        |       |   |        |
| 12 | 22 | 0.308  | 0.068 | -1.218 | 14.07 | 9 | 0.1199 |
| 13 |    |        |       |        |       |   |        |
| 14 | 3  | 0.311  | 0.071 | 1.017  | 11.50 | 9 | 0.2433 |
| 15 | 19 | 0.413  | 0.072 | -1.247 | 10.59 | 9 | 0.3048 |
| 16 |    |        |       |        |       |   |        |
| 17 | 8  | 0.561  | 0.077 | 0.105  | 4.79  | 9 | 0.8525 |
| 18 |    |        |       |        |       |   |        |
| 19 | 13 | 0.646  | 0.087 | 0.621  | 9.37  | 9 | 0.4035 |
| 20 |    |        |       |        |       |   |        |
| 21 | 14 | 1.164  | 0.084 | -2.326 | 13.15 | 9 | 0.1560 |
| 22 |    |        |       |        |       |   |        |

---

*Note*

<sup>§</sup> Bonferroni corrections applied P is statistically significant if <0.005

<sup>%</sup> Bonferroni corrections applied P is statistically significant if <0.006

<sup>§</sup> Bonferroni corrections applied P is statistically significant if <0.01

<sup>§§</sup> Bonferroni corrections applied P is statistically significant if <0.003

<sup>%%</sup> LD (Locally Dependent) items; combined into a testlet (item 2 and 10)

<sup>§§</sup> DIF (Differential Item Functioning) items combined into a testlet (items 12, 16, 21, 23)

**Table 4.** Conversion table for the Difficulty scale of the Strengths and Difficulties Questionnaire parents (SDQ-P)

| <b>Original Total Difficulty score</b><br><b>(ordinal data)</b> | <b>Logit scores</b><br><b>(interval level data)</b> | <b>Converted logit scores to</b><br><b>0-40 scale</b><br><b>(interval level data)</b> |
|-----------------------------------------------------------------|-----------------------------------------------------|---------------------------------------------------------------------------------------|
| 0                                                               | -4.483                                              | 0                                                                                     |
| 1                                                               | -3.655                                              | 4                                                                                     |
| 2                                                               | -3.082                                              | 7                                                                                     |
| 3                                                               | -2.685                                              | 8                                                                                     |
| 4                                                               | -2.375                                              | 10                                                                                    |
| 5                                                               | -2.117                                              | 11                                                                                    |
| 6                                                               | -1.895                                              | 12                                                                                    |
| 7                                                               | -1.699                                              | 13                                                                                    |
| 8                                                               | -1.522                                              | 14                                                                                    |
| 9                                                               | -1.36                                               | 15                                                                                    |
| 10                                                              | -1.209                                              | 15                                                                                    |
| 11                                                              | -1.068                                              | 16                                                                                    |
| 12                                                              | -0.935                                              | 16                                                                                    |
| 13                                                              | -0.809                                              | 17                                                                                    |
| 14                                                              | -0.687                                              | 18                                                                                    |
| 15                                                              | -0.571                                              | 18                                                                                    |
| 16                                                              | -0.457                                              | 19                                                                                    |
| 17                                                              | -0.347                                              | 19                                                                                    |
| 18                                                              | -0.24                                               | 20                                                                                    |
| 19                                                              | -0.134                                              | 20                                                                                    |
| 20                                                              | -0.029                                              | 21                                                                                    |
| 21                                                              | 0.075                                               | 21                                                                                    |
| 22                                                              | 0.178                                               | 22                                                                                    |
| 23                                                              | 0.282                                               | 22                                                                                    |

|    |    |       |    |
|----|----|-------|----|
| 1  |    |       |    |
| 2  |    |       |    |
| 3  | 24 | 0.386 | 23 |
| 4  |    |       |    |
| 5  | 25 | 0.492 | 23 |
| 6  |    |       |    |
| 7  | 26 | 0.599 | 24 |
| 8  |    |       |    |
| 9  | 27 | 0.709 | 24 |
| 10 |    |       |    |
| 11 | 28 | 0.822 | 25 |
| 12 |    |       |    |
| 13 | 29 | 0.94  | 25 |
| 14 |    |       |    |
| 15 | 30 | 1.064 | 26 |
| 16 |    |       |    |
| 17 | 31 | 1.196 | 26 |
| 18 |    |       |    |
| 19 | 32 | 1.337 | 27 |
| 20 |    |       |    |
| 21 | 33 | 1.491 | 28 |
| 22 |    |       |    |
| 23 | 34 | 1.663 | 29 |
| 24 |    |       |    |
| 25 | 35 | 1.859 | 29 |
| 26 |    |       |    |
| 27 | 36 | 2.09  | 31 |
| 28 |    |       |    |
| 29 | 37 | 2.373 | 32 |
| 30 |    |       |    |
| 31 | 38 | 2.746 | 34 |
| 32 |    |       |    |
| 33 | 39 | 3.301 | 36 |
| 34 |    |       |    |
| 35 | 40 | 4.125 | 40 |

---

For peer review only

33  
34  
35  
36  
37  
38  
39  
40  
41  
42  
43  
44  
45  
46  
47  
48  
49  
50  
51  
52  
53  
54  
55  
56  
57  
58  
59  
60

### Author contributions

PK conceived of the study, led on study design, project management, data analysis and dissemination. AV, HE, KMcP contributed to study design. AV contributed to the data analysis. PK drafted the manuscript and is the guarantor. All authors revised it critically for important intellectual content and approved the final version for publication. All authors agree to be accountable for all aspects of the work.

### Competing Interests

All authors have completed the ICMJE uniform disclosure form at [www.icmje.org/coi\\_disclosure.pdf](http://www.icmje.org/coi_disclosure.pdf) and declare: PK, AV, HE, KMcP had financial support from the Ministry of Health of New Zealand for the submitted work; subsequent to the completion of this project and data analysis KMcP became the Chief Executive of the Health Research Council of New Zealand; all other authors declare no financial relationships with any organisations that might have an interest in the submitted work in the previous three years; no other relationships or activities that could appear to have influenced the submitted work. The views and opinions expressed in this article are those of the authors and do not necessarily reflect the official policy or position of the funder.

### Data sharing

Quantitative data from the study can be obtained from the author, subject to the funder's permission.

## References

1. Goodman R. The strengths and difficulties questionnaire: A research note. *Journal of Child Psychology and Psychiatry and Allied Disciplines* 1997;**38**(5):581-86.
2. Goodman R, Meltzer H, Bailey V. The Strengths and Difficulties Questionnaire: a pilot study on the validity of the self-report version. *European Child & Adolescent Psychiatry* 1998;**7**(3):125-30.
3. Ministry of Health. The B4 School Check. A handbook for practitioners. Wellington, 2008.
4. Williamson A, Este C, Clapham K, et al. What are the factors associated with good mental health among Aboriginal children in urban New South Wales, Australia? Phase I findings from the Study of Environment on Aboriginal Resilience and Child Health (SEARCH). *BMJ Open* 2016;**6**(7).
5. Klein AM, Otto Y, Fuchs S, et al. Psychometric properties of the parent-rated SDQ in preschoolers. *European Journal of Psychological Assessment* 2013;**29**(2):96-104.
6. Tobia V, Gabriele MA, Marzocchi GM. The Italian Version of the Strengths and Difficulties Questionnaire (SDQ)-Teacher: Psychometric Properties. *Journal of Psychoeducational Assessment* 2013;**31**(5):493-505.
7. Mieloo CL, Bevaart F, Donker MC, et al. Validation of the SDQ in a multi-ethnic population of young children. *The European Journal of Public Health* 2014;**24**(1):26-32.
8. Kersten P, Czuba K, McPherson KM, et al. A systematic review of evidence for the psychometric properties of the Strengths and Difficulties Questionnaire. *International Journal of Behavioral Development* 2016;**40**(1):64-75.
9. Rasch G. *Probabilistic models for some intelligence and attainment tests (revised and expanded ed.)*. Chicago: The University of Chicago Press, 1960/1980.
10. Wright BD. Comparing Rasch measurement and factor analysis. *Structural Equation Modeling* 1996;**3**:3-24.
11. Christensen KB, Engelhard J, G., Salzberger T. Rasch vs. Factor Analysis. *Rasch Measurement Transactions* 2012;**26**(3):1373-8.

12. Borg A-M, Pälvi K, Raili S, et al. Reliability of the Strengths and Difficulties Questionnaire among Finnish 4-9-year-old children. *Nordic Journal of Psychiatry* 2012;**66**(6):403-13.
13. Statistics New Zealand. Māori Population Estimates: Mean year ended 31 December 2016. [http://archive.stats.govt.nz/browse\\_for\\_stats/population/estimates\\_and\\_projections/MaoriPopulationEstimates\\_HOTPMYe31Dec16.aspx](http://archive.stats.govt.nz/browse_for_stats/population/estimates_and_projections/MaoriPopulationEstimates_HOTPMYe31Dec16.aspx). Downloaded 4 Jan 2018.
14. Høegh MC, Høegh S-M. Trans-adapting outcome measures in rehabilitation: Cross-cultural issues. *Neuropsychological Rehabilitation* 2009;**19**(6):955-70.
15. de Klerk G. Cross-Cultural Testing In: Born M, Foxcroft, C.D., Butter, R., ed. *Online Readings in Testing and Assessment*: International Test Commission, 2008.
16. Kersten P, Dudley M, Nayar S, et al. Cross-cultural acceptability and utility of the strengths and difficulties questionnaire: views of families. *BMC Psychiatry* 2016;**16**(1):347.
17. Andrich D. *Rasch models for measurement series: quantitative applications in the social sciences no. 68*. London: Sage Publications, 1988.
18. Linacre JM. Rasch Power Analysis: Size vs. Significance: Infit and Outfit Mean-Square and Standardized Chi-Square Fit Statistic. *Rasch Meas Trans* 2003;**17**(1):918.
19. Tennant A, Pallant JF. The Root Mean Square Error of Approximation (RMSEA) as a supplementary statistic to determine fit to the Rasch model with large sample sizes. *Rasch Meas Trans* 2012;**25**(4):1348-9.
20. Streiner DL, Norman GR. *Health Measurement Scales: a practical guide to their development and use*. Oxford: Oxford University Press, 2008.
21. Charter RA, Feldt LS. Confidence intervals for true scores: Is there a correct approach? *Journal of Psychoeducational Assessment* 2001;**19**(4):350-64.
22. Nunnally JC, Bernstein IH. *Psychometric theory (3rd ed.)*. New York: McGraw-Hill, 1994.
23. RUMM2030 [program]: RUMM Laboratory Pty Ltd., 2009.
24. Marais I, Andrich D. Effects of varying magnitude and patterns of response dependence in the unidimensional Rasch model. *Journal of Applied Measurement* 2008;**9**(2):105-24.
25. Wainer H, Kiely G. Item clusters and computer adaptive testing: A case for testlets. *J Educ measurement* 1987;**24**:185-202.



- 1
- 2
- 3 26. Grimby G. Useful reporting of DIF. *Rasch Measurement Transactions* 1998;**12**(3):651.
- 4
- 5 27. Holland PW, Wainer H. *Differential Item Functioning*. NJ: Hillsdale. Lawrence Erlbaum, 1993.
- 6
- 7 28. Smith EV. Detecting and evaluation the impact of multidimensionality using item fit statistics and
- 8 principal component analysis of residuals. *Journal of Applied Measurement* 2002;**3**:205-31.
- 9
- 10 29. Tennant A, Pallant JF. Unidimensionality matters! (a tale of two Smiths?). *Rasch Measurement*
- 11 *Transactions* 2006;**20**:1048-51.
- 12
- 13 30. Wright BD. Reliability and separation. *Rasch Measurement Transactions* 1996;**9**(4):472.
- 14
- 15 31. Sheng Y, Sheng Z. Is Coefficient Alpha Robust to Non-Normal Data? *Frontiers in Psychology*
- 16 2012;**34**(1):1-13.
- 17
- 18 32. Wright BD. Separation, Reliability and Skewed Distributions: Statistically Different Levels of
- 19 Performance. *Rasch Meas Trans* 2001;**14**(4):786.
- 20
- 21 33. Stone LL, Otten R, Engels RC, et al. Psychometric properties of the parent and teacher versions of
- 22 the strengths and difficulties questionnaire for 4- to 12-year-olds: a review. *Clinical Child*
- 23 *And Family Psychology Review* 2010;**13**(3):254-74.
- 24
- 25 34. Goodman A, Patel V, Leon DA. Why do British Indian children have an apparent mental health
- 26 advantage? *Journal of Child Psychology and Psychiatry and Allied Disciplines*
- 27 2010;**51**(10):1171-83.
- 28
- 29 35. Williamson A, Redman S, Dadds M, et al. Acceptability of an emotional and behavioural
- 30 screening tool for children in Aboriginal Community Controlled Health Services in urban
- 31 NSW. *Australian and New Zealand Journal of Psychiatry* 2010;**44**(10):894-900.
- 32
- 33 36. Beaton DE, Bombardier C, Guillemin F, et al. Guidelines for the process of cross-cultural
- 34 adaptation of self-report measures. *Spine* 2000;**25**(24):3186-91.
- 35
- 36 37. Samad L, Hollis C, Prince M, et al. Child and adolescent psychopathology in a developing
- 37 country: Testing the validity of the Strengths and Difficulties Questionnaire (Urdu version).
- 38 *International Journal Of Methods In Psychiatric Research* 2005;**14**(3):158-66.
- 39
- 40 38. Thabet AA, Stretch D, Vostanis P. Child mental health problems in Arab children: Application of
- 41 the strengths and difficulties questionnaire. *International Journal of Social Psychiatry*
- 42 2000;**46**(4):266-80.
- 43
- 44
- 45
- 46
- 47
- 48
- 49
- 50
- 51
- 52
- 53
- 54
- 55
- 56
- 57
- 58
- 59
- 60

- 1  
2  
3 39. Lane C. Adult literacy and numeracy in New Zealand – A regional analysis. Perspectives from the  
4  
5 Adult Literacy and Life Skills Survey, 2012.  
6  
7 40. Statistics New Zealand. 2013 Census QuickStats about culture and identity. Available from  
8  
9 <http://www.stats.govt.nz>. Wellington, New Zealand, 2014.  
10  
11 41. Hedley C, Thompson S, Morris Mathews K, et al. The B4 School Check behaviour measures:  
12  
13 Findings from the Hawke's Bay evaluation. *Nursing Praxis in New Zealand* 2012;**28**(3):13-23.  
14  
15  
16  
17  
18  
19  
20  
21  
22  
23  
24  
25  
26  
27  
28  
29  
30  
31  
32  
33  
34  
35  
36  
37  
38  
39  
40  
41  
42  
43  
44  
45  
46  
47  
48  
49  
50  
51  
52  
53  
54  
55  
56  
57  
58  
59  
60

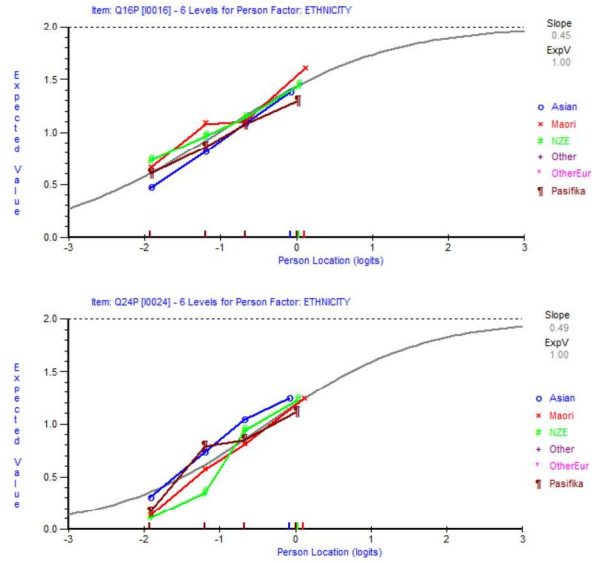

Figure 1. Item Characteristics Curves for items from the Strengths and Difficulties Questionnaire (parents, n=1,000)

209x297mm (300 x 300 DPI)

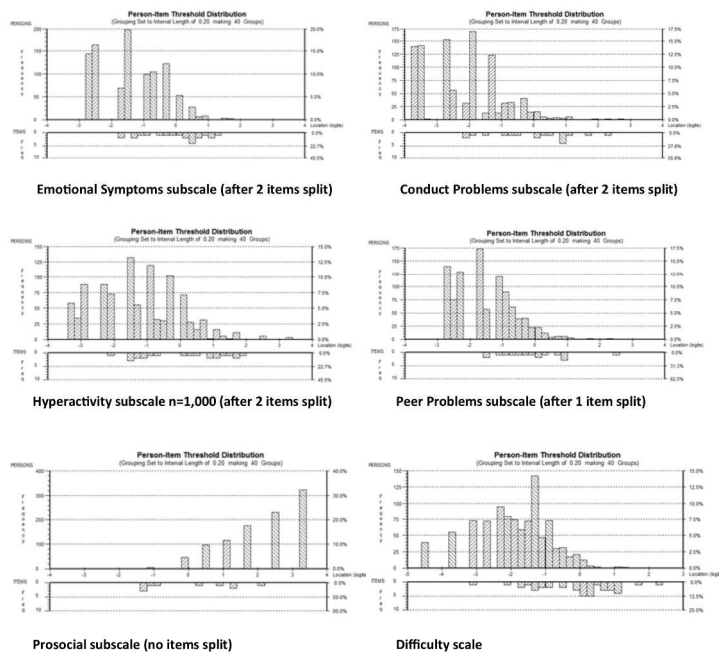

Figure 2. Person-item-threshold maps Strengths and Difficulties Questionnaire (parents, n=1,000)

209x297mm (300 x 300 DPI)

# BMJ Open

## Strengths and Difficulties Questionnaire: internal validity and reliability for New Zealand pre-schoolers

|                                 |                                                                                                                                                                                                                                                                                                                                                                                                                                                                       |
|---------------------------------|-----------------------------------------------------------------------------------------------------------------------------------------------------------------------------------------------------------------------------------------------------------------------------------------------------------------------------------------------------------------------------------------------------------------------------------------------------------------------|
| Journal:                        | <i>BMJ Open</i>                                                                                                                                                                                                                                                                                                                                                                                                                                                       |
| Manuscript ID                   | bmjopen-2018-021551.R1                                                                                                                                                                                                                                                                                                                                                                                                                                                |
| Article Type:                   | Research                                                                                                                                                                                                                                                                                                                                                                                                                                                              |
| Date Submitted by the Author:   | 07-Mar-2018                                                                                                                                                                                                                                                                                                                                                                                                                                                           |
| Complete List of Authors:       | Kersten, Paula; University of Brighton, School of Health Sciences<br>Vandal, Alain; AUT University, Department of Biostatistics and Epidemiology; Counties Manukau District Health Board, Ko Awatea Health Intelligence and Informatics<br>Elder, Hinemoa; Te Whare Wānanga o Awanuiārangī, School of Graduate Studies<br>McPherson, Kathryn; Health Research Council of New Zealand; AUT University, Centre for Person Centred Research, School of Clinical Sciences |
| <b>Primary Subject Heading</b>: | Research methods                                                                                                                                                                                                                                                                                                                                                                                                                                                      |
| Secondary Subject Heading:      | Public health, Research methods                                                                                                                                                                                                                                                                                                                                                                                                                                       |
| Keywords:                       | Strengths and Difficulties Questionnaire, validity, reliability, Rasch, pre-school                                                                                                                                                                                                                                                                                                                                                                                    |
|                                 |                                                                                                                                                                                                                                                                                                                                                                                                                                                                       |

SCHOLARONE™  
Manuscripts

Only

# Strengths and Difficulties Questionnaire: internal validity and reliability for New Zealand pre-schoolers

Paula Kersten<sup>1</sup>, Alain C Vandal<sup>2</sup>, Hinemoa Elder<sup>3</sup>, Kathryn M McPherson<sup>4,5</sup>

<sup>1</sup> School of Health Sciences, University of Brighton, UK

<sup>2</sup> Department of Biostatistics and Epidemiology, AUT University, New Zealand & Ko Awatea Health Intelligence and Informatics, Counties Manukau District Health Board, New Zealand

<sup>3</sup> Te Whare Wānanga o Awanuiārangi, Auckland, New Zealand.

<sup>4</sup> The Health Research Council of New Zealand

<sup>5</sup> Centre for Person Centred Research, School of Clinical Sciences, AUT University, New Zealand.

## Corresponding author

Professor Paula Kersten, School of Health Sciences, University of Brighton, Westlaine House, Falmer, Brighton BN1 9PH. [p.kersten@brighton.ac.uk](mailto:p.kersten@brighton.ac.uk). Tel +44 1273 643483. Fax: +44 1273 644010.

## Abstract

**Objectives:** This observational study examines the internal construct validity, internal consistency and cross-informant reliability of the Strengths and Difficulties Questionnaire (SDQ) in a New Zealand pre-school population across four ethnicity strata (New Zealand European, Māori, Pasifika, Asian).

**Design:** Rasch analysis was employed to examine internal validity on a subsample of 1,000 children. Internal consistency (n=29,075) and cross-informant reliability (n=17,006) was examined using correlations, intraclass correlation coefficients and Cronbach's Alpha on the sample available for such analyses.

**Setting & participants:** Data were utilised from a national SDQ database provided by the funder, pertaining to New Zealand domiciled children aged 4 and 5, and scored by their parents and teachers.

**Results:** The five subscales do not fit the Rasch model (as indicated by the overall fit statistics); contain items that are biased (differential item functioning) by key variables, suffer from a floor and ceiling effect and have unacceptable internal consistency. After dealing with differential item functioning the Total Difficulty scale does fit the Rasch model and has good internal consistency. Parent/teacher inter-rater reliability was unacceptably low for all subscales.

**Conclusion:** The five SDQ subscales are not valid and not suitable for use in their own right in New Zealand. We have provided a conversion table for the Total Difficulty scale, which takes account of bias by ethnic group. Clinicians should use this conversion table in order to reconcile differential item functioning by culture in final scores. It is advisable to use both parents and teachers' feedback when considering children's needs for referral of further assessment. Future work should examine whether validity is impacted by different language versions used in the same country.

## Keywords

Strengths and Difficulties Questionnaire, validity, reliability, Rasch, pre-school

### Strengths and limitations of this study

- A key strength of this study is the inclusion of all 4 and 5 year old children in New Zealand for whom an SDQ assessment was available in 2011, resulting in our ability to assess the validity of the tool at the population level and with sufficient power to make sound conclusions.
- A strength of the study included robust data quality checks, and the exclusion of 39% of cases for which we had concerns about their quality (it being incomplete or containing multiple inconsistencies).
- A limitation was our inability to assess DIF by other key variables that may affect validity, e.g. first language or country of birth, as such data were not available.
- Future work should examine whether validity is impacted by different language versions used (in the same country).

### Funding

This work was supported by the Ministry of Health of New Zealand (grant number 341088). The funding body has not had input into the design, data collection, analysis, interpretation of data, in the writing of the manuscript, nor in the decision to submit the manuscript for publication.

### Acknowledgements

We thank the funder for supporting the study.



## Introduction

Educational achievement and problems in primary and secondary school aged children can arise as a result of behavioural and emotional problems when the child is of pre-school age.<sup>1-5</sup> Consequently, screening to identify children with, or at risk of behavioural problems at a pre-school age is an increasingly used preventative strategy, aiming to enhance the success of support programmes and early intervention.<sup>6</sup> Such screening is best performed using standardised methods, and for behavioural assessment this means the use of a questionnaire based measure. The Strengths and Difficulties Questionnaire for parents (SDQ-P) and for teachers (SDQ-T) is a tool used worldwide for this purpose to screen pre-school children's psychosocial attributes (positive and negative behaviours).<sup>7-10</sup> It consists of 25 items, making up five subscales: Emotional Symptoms, Conduct Problems, Hyperactivity, Peer Problems, and Prosocial Behaviour.<sup>7,8</sup>

Before using a measure such as the SDQ, establishing validity and reliability is key for optimum decision-making. At present there are two dominant approaches to the development and testing of measures: Classical Test Theory (CTT) and Modern Test Theory (also known as item response theory).<sup>11</sup> In CTT it is assumed that the observed scores on items are the sum of the true score (which we cannot directly measure) and measurement error. However, neither the true score, nor the measurement error can be determined and the approach is therefore flawed.<sup>12</sup> In addition, the best conclusion that can be made following satisfactory tests of validity and reliability using CTT is that an outcome measure is an ordinal scale. Yet, many statistical tests that examine the validity of scales assume that the data arising are of interval nature. Indeed, in the pre-school population, the SDQ has only been tested using parametric, CTT approaches, as demonstrated in our recent systematic review<sup>13</sup> to which we return below. By contrast, Modern Test Theory approaches, such as Rasch analysis, are underpinned by mathematical models that specify the conditions under which equal interval measurements can be estimated from outcome measurement data.<sup>14-16</sup> These approaches are therefore more robust.

1  
2  
3 Evaluations of the structural validity of the SDQ drawing on CTT in pre-schoolers has been  
4 extensively researched using factor analysis (e.g. by <sup>17-19</sup>), Cronbach's alphas ( $\alpha$ )<sup>13</sup> and correlation  
5 coefficients,<sup>13 20</sup> and Weighted Least Squares in older children.<sup>21</sup> Our systematic review found  
6 acceptable to good evidence for the 5-factor SDQ structure in pre-schoolers, when confirmatory factor  
7 analysis (CFA) had been used.<sup>13</sup> A different approach to examining structural validity, using Modern  
8 Test Theory, can be achieved by examining whether each of the subscales are unidimensional and fit  
9 the Rasch model (i.e. examining internal construct validity).<sup>15</sup> Like CFA, Rasch analysis is a  
10 confirmatory approach to examining whether items belong to the subscales under investigation.  
11 However, there are known limitations to using factor analysis on ordinal scales, including its  
12 parametric basis and the emergence of 'difficulty factors', which may spuriously indicate  
13 multidimensionality.<sup>22</sup> In addition, factor analysis does not allow detailed investigation of item  
14 function in regard to targeting, differential item functioning and local dependency between items,  
15 whereas Rasch analysis includes such assessments.<sup>23</sup> We identified one study which had employed  
16 Rasch analysis on SDQ data that had been self-completed by 12 to 18 year olds in Sweden.<sup>24</sup> This  
17 study showed that none of the SDQ scales was psychometrically robust, with mis-fitting items in all  
18 five subscales and poor internal consistency. However, that study did not examine whether the scale  
19 was invariant across different subgroups.  
20  
21  
22  
23  
24  
25  
26  
27  
28  
29  
30  
31  
32  
33  
34  
35  
36  
37

38 Internal consistency of the SDQ-P subscales has been reported in many studies and synthesised in a  
39 systematic review.<sup>13</sup> The sample size-weighted average Cronbach's alphas ( $\alpha$ ) for the five subscales  
40 was below the threshold of 0.70 (implying inadequate internal consistency for shorter, established  
41 scales); and for the Difficulty scale  $\alpha$  was 0.79 (acceptable for group comparisons but not for  
42 individual use).<sup>25 (p91)</sup>  
43  
44  
45  
46  
47  
48  
49

50 Inter-rater reliability of SDQ subscales between two parents and between two teachers has previously  
51 been found to be acceptable when correlation coefficients were used (between 0.42 and 0.64 for  
52 parents and between 0.59 and 0.81 for teachers).<sup>20</sup> Other studies have examined scores between  
53 different types of informants (e.g. parent and teacher). The systematic review showed that the sample  
54  
55  
56  
57  
58  
59  
60

1  
2  
3 size-weighted average correlation coefficients generated from these studies were weak to moderate  
4  
5 (between 0.25 and 0.45).<sup>13</sup>  
6  
7

8  
9 The validity and reliability of the SDQ have not previously been examined in New Zealand, a country  
10  
11 with a sizeable indigenous population (Māori, 15.4%) and immigrant population (25.2% born  
12  
13 overseas).<sup>26</sup> New Zealand is a multi-cultural society, impacting upon values, ways of living and  
14  
15 languages spoken. It cannot be assumed that measures capturing psychological constructs will have  
16  
17 cultural equivalence.<sup>27 28</sup> Indeed, a New Zealand qualitative study has shown that parents from Māori,  
18  
19 Pacific Island, Asian, and new immigrant groups questioned the cultural validity of the SDQ.<sup>29</sup>  
20  
21 Cultural equivalence therefore needs further investigation.  
22  
23

24  
25 In summary, the use of Classical Test Theory approaches to examine the validity of the SDQ are  
26  
27 limited, evidence suggests cross-informant reliability is weak, and there is no evidence for cultural  
28  
29 equivalence for the New Zealand population. Therefore, we aimed to use Modern Test Theory, and  
30  
31 specifically Rasch analysis, to examine the internal construct validity and cultural equivalence of the  
32  
33 SDQ in a New Zealand pre-school population across different ethnicity strata; and to examine  
34  
35 reliability between parents and teachers (cross-informant reliability). We hypothesised that the SDQ  
36  
37 subscales and the Difficulty scale would i) have cross-informant reliability (with consistency in scores  
38  
39 by parents and teachers); ii) fit the Rasch model (demonstrating unidimensionality and internal  
40  
41 construct validity), and iii) have cultural equivalence across ethnic strata (demonstrated by an absence  
42  
43 of item differential function or DIF).  
44  
45

## 46 47 **Methods**

### 48 49 **Study design and sample**

50  
51 This observational study utilised SDQ data gathered during the New Zealand Before School Check  
52  
53 (B4SC), which takes place when the child is aged (4 or exceptionally aged 5).<sup>9</sup> The B4SC is carried  
54  
55 out by registered nurses based in primary care and involves the assessment of the child's general  
56  
57

1  
2  
3 health, hearing, oral health, vision, growth as well as developmental and behavioural problems. The  
4 latter is evaluated using the Australian SDQ version for 2 to 4 year olds, completed by the parent. If  
5 the child is in pre-school the nurse also requests their teacher to complete the SDQ for the child. Clear  
6 instructions for the administration of the SDQ are provided within the B4SC handbook. In New  
7 Zealand there is no other SDQ data collection point during childhood.

8  
9  
10  
11  
12  
13  
14 Data sources/quality, missing data and bias: Permission to use the full, de-identified 2011 national  
15 B4SC SDQ dataset for pre-schoolers (n=51,251) from the New Zealand Ministry of Health was  
16 provided by the B4SC Governance Board. Data quality checks on SDQ data resulted in the deletion of  
17 20,024 cases (out of n=51,251, 39%) for the following reasons:

- 18  
19  
20  
21  
22 1. Individual item data from the parent questionnaire were missing completely (n=19,197) or  
23 partially (n=1) since a) we would not have been able to carry out a quality check of the subscale  
24 scores, and b) we would not be able to use these data for the Rasch analysis); thus 19,198 were  
25 removed from the analysis set;
- 26  
27  
28  
29  
30 2. District Health Boards (DHB) for which we had fewer than 15% of data on individual items,  
31 since the quality of their data is in doubt: although a total of 12,720 records came from these  
32 DHBs, this extra step only entailed the removal of a further 375 records from the analysis set  
33 after step 1;
- 34  
35  
36  
37  
38 3. Children's ages were recorded as younger than 4 or older than 5 when the SDQ was completed  
39 (we suspect some of these ages may have been entered incorrectly; however this step only  
40 entailed the removal of a further 451 records from the analysis set after steps 1 and 2;
- 41  
42  
43  
44 4. Cases with all zero scores: these were deemed potentially erroneous as the Prosocial subscale is  
45 scored in the opposite direction from the other subscales; although 1,038 cases fitted this profile,  
46 none had complete parental item data, and so no further record was removed on the basis of this  
47 criterion after steps 1, 2 and 3.

48  
49  
50  
51  
52  
53  
54 Study size: In total 29,075 cases remained in the parents' dataset; 17,006 remained for the parent-  
55 teacher cross-informant reliability analysis. Rasch analysis uses fit statistics, but these are not suited

1  
2  
3 to such large sample sizes. Fit to the Rasch model is considered acceptable when the observed data fit  
4 the predetermined Rasch model,<sup>15 30</sup> traditionally examined with fit statistics (e.g. the item-trait  
5 interaction chi-square). A non-significant chi-square indicates fit to the Rasch model. Power increases  
6 with large samples, which inflates the chi-square and results in negligible small differences appearing  
7 as a statistically significant misfit between the data and the model.<sup>31 32</sup> Therefore, our Rasch analysis  
8 was carried out on a smaller sample (n=1,000), to allow examination of convergence to the Rasch  
9 model. The sample was created by randomly sampling equal numbers of cases from the total parent  
10 sample, for four main ethnic groups (250/ethnic group): New Zealand European (NZE), Māori, Asian  
11 and Pasifika. This is well above the recommended sample size for studies using Rasch analysis. For  
12 example, it has been suggested that to have 99% confidence that the estimated item difficulty is within  
13 +/- ½ logit of its stable value on the interval metric, the minimum sample size range is 108 to 243  
14 (best to poor targeting).<sup>33 34</sup>

### 25 26 27 28 **Instruments**

29  
30 The SDQ consists of 25 items, each with three response options: not true, somewhat true, and  
31 certainly true. The four SDQ subscales reflecting problematic behaviours or emotions (Emotional  
32 Symptoms, Conduct Problems, Hyperactivity, Peer Problems) contain 15 positively worded items and  
33 five negatively worded items.<sup>7 8</sup> Positively worded items are reverse scored (in New Zealand this is  
34 done on data entry), thus higher subscale scores denote greater problems. Scores from these four  
35 subscales are also summed to give an overall Difficulty score ranging from 0-40. The five items  
36 making up the Prosocial Behaviour subscale are positively worded and higher scores denote better  
37 social behaviour.

### 38 39 40 41 42 43 44 45 46 47 **Data analysis**

48  
49 Cross-informant reliability (between parents and teachers) was assessed for those cases for which both  
50 parent and teacher SDQ data were available (n=17,006). The Intraclass Correlation Coefficient (ICC)  
51 is the preferred statistical technique and was used.<sup>25 35</sup> However, as many studies of the SDQ have  
52 used correlations<sup>36</sup> we will also present those.

1  
2  
3  
4  
5 Each SDQ subscale and the Difficulty scale were fitted to the Rasch model to examine fit, using  
6 RUMM2030 software.<sup>37</sup> Fit was considered acceptable if there was a non-substantial deviation of  
7 individual items and respondents from the Rasch model (individual item and person Fit Residuals  
8 should be within the range of +/- 2.5, the average Fit Residual statistics should be close to a mean of  
9 zero and standard deviation of one, the item chi-squares should be non-significant). In addition, we  
10 used the Root Mean Square Error of Approximation (RMSEA) to examine fit, with RMSEA<0.02  
11 suggesting data fit the Rasch model (Box 1).<sup>32</sup>  
12  
13  
14  
15  
16  
17  
18  
19

20 Log-transformed item scores generated from the response choices should reflect the increasing or  
21 decreasing latent trait to be measured (threshold ordering).<sup>30</sup> When a given level of problems is not  
22 confirmed by the expected response option to an item, disordered thresholds are observed.  
23 Disordering is only considered statistically significant if the 95% confidence intervals of the threshold  
24 locations do not overlap. When significant disordering is observed response categories can be  
25 combined.  
26  
27  
28  
29  
30  
31  
32  
33

34 An assumption of the Rasch model is that the answers to one item should not be dependent on the  
35 responses to another item, conditional upon the trait being measured. This local independence is  
36 examined by exploring the correlations between items' residuals, which should not be more than 0.20  
37 above the average residual correlation.<sup>38</sup> If locally dependent items are observed they can be  
38 combined into a testlet, a bundle of items that share a common stimulus.<sup>39</sup>  
39  
40  
41  
42  
43  
44  
45

46 The Rasch model expects that each item is invariant (unbiased) across key groups (e.g. ethnicity or  
47 gender),<sup>40 41</sup> examined statistically with an Analysis of Variance (ANOVA) and visually by examining  
48 the Item Characteristic Curves (ICC). Variance (Differential Item Functioning, DIF) can be uniform;  
49 the bias is present consistently across the trait. For example, uniform DIF by ethnic group implies that  
50 item difficulty is different for individual ethnic groups across the trait even though their underlying  
51 level of problems is the same. DIF can also be non-uniform; the bias is not consistent across the trait.  
52  
53  
54  
55  
56  
57  
58  
59

1  
2  
3 DIF analysis is affected by large sample sizes with non-significant DIF showing as significant; hence  
4 inspection of ICCs is also important. When uniform DIF is observed two strategies can be employed.  
5 First, DIF items (if present in >1 item) can be combined into a testlet to examine if DIF is cancelled  
6 out at the test level; second, the item can be split by the variable for which DIF is observed. In our  
7 analysis we considered the final solution to be the one with the best improvements in fit statistics.  
8  
9  
10  
11  
12

13  
14 Another key assumption of the Rasch model is that a scale must be unidimensional. This is examined  
15 by creating two subsets of items, identified by a principal component analysis of the item residuals,  
16 with those loading negatively forming one set and those positively loading the second set.<sup>42</sup> An  
17 independent t-test is used to compare estimates derived from the two subtests for each respondent.  
18 When fewer than 5% of the t-tests are significant (or the 95% confidence interval of t-tests includes  
19 5%) unidimensionality is supported.<sup>42 43</sup>  
20  
21  
22  
23  
24  
25  
26  
27

28 Targeting of the subscales to the population was examined with person-item-threshold maps.  
29  
30

31  
32 Internal consistency was examined with Cronbach's alpha and Person Separation Index (PSI)  
33 statistics. PSI is an indicator of the number of statistically different strata (groups) that the test can  
34 identify in the sample.<sup>44</sup> Interpretation of the PSI is similar to Cronbach's alpha with values  $\geq 0.70$   
35 suitable for group comparisons and  $\geq 0.85$  for individual clinical use. However, Cronbach's alpha can  
36 only be calculated when there are no missing data and is not considered robust with skewed data.<sup>45</sup>  
37 Therefore, we present PSI and Cronbach's alpha in summary tables as well as the number of groups  
38 between which the subscale is able to discriminate.<sup>46</sup>  
39  
40  
41  
42  
43  
44  
45  
46  
47

48 Finally, for polytomous scales two Rasch models can be used. The Rating Scale version assumes that  
49 the distance between thresholds is equal across items.<sup>47</sup> The Unrestricted (Partial Credit) model does  
50 not make this assumption.<sup>48</sup> A log-likelihood test examines whether results from these two models are  
51 significantly different and if this is so the Partial Credit model should be used. This test was  
52 significant ( $p < 0.001$ ) for all subscales and therefore the Partial Credit model was used.  
53  
54  
55  
56  
57

## Patient and Public Involvement

End users of our research include families, pre-school teachers, service providers and the Ministry of Health. The research aims and questions were part of a tender prepared by the Ministry of Health, to which we responded. Thus, we did not have the ability to include end users in the development of study questions. The analysis presented here did not require participant recruitment or data collection and end users were therefore not consulted about the study design. Researchers in New Zealand have a responsibility to ensure their research is of value and culturally responsive to Māori. Therefore, guidance for the study was sought from the University's Mātauranga Māori committee, which members are drawn from a wide range of Māori communities. The findings from the part of the study reported here were presented to the Ministry of Health.

Ethical approval was obtained from the New Zealand Health and Disability Ethics Committee (Northern A, NTY/12/04/028/AM05) and the Auckland University of Technology's Ethics Committee (12/163).

## Results

The child gender split was balanced with 49% female and 51% male in the full parent sample, as well as the cross-comparison sample; 99.6% were aged four at the time of the B4SC (0.4% of children had recently turned 5). Child ethnicity in the parent sample was 57% NZE, 23% Māori, 12% Pasifika, and 8% Asian; this distribution was similar in the cross-comparison sample 63% NZE, 16% Māori, 7% Pasifika, and 7% Asian. As noted above, there were no missing data in the selected samples.

### *Cross-informant reliability (n=17,006)*

Cross-informant reliability between parent and teachers as measured by correlations was generally poor (all <0.5, mean 0.28) and ICCs (all <0.6, mean 0.13). Cross-informant reliability was better in



1  
2  
3 the Hyperactivity subscale, and worst in the Prosocial subscale; better for NZE and worst for Pasifika  
4 children (table 1).  
5  
6  
7

### 8 9 *Internal validity & cross-cultural equivalence*

10  
11  
12  
13 Table 2 displays results from the Rasch analysis.  
14  
15

#### 16 17 18 19 20 21 22 **Emotional Symptoms subscale**

23  
24 All items in this subscale had ordered thresholds, items were locally independent and the subscale was  
25 unidimensional. Person fit was adequate with a mean person fit residual reasonably close to 0 and the  
26 SD below 1.4 (Table 2: analysis 1). However, overall fit to the Rasch model was unsatisfactory  
27 (RMSEA >0.02). PSI was below zero and Cronbach's alpha ( $\alpha$ ) 0.15. All item fit residuals were  
28 within the acceptable range of -2.5 to 2.5; however, four out of five item chi-square values were  
29 statistically significant, indicating misfit.  
30  
31  
32  
33  
34  
35

36  
37  
38 There was statistically significant uniform DIF by ethnicity in items 16 and 24, which was confirmed  
39 by visual inspection of the ICCs (figure 1). Items 16 and 24 were combined into a testlet. This  
40 resulted in poorer person fit and similar RMSEA values (0.072). We therefore split these items by  
41 ethnic groups instead, creating unique items for NZE, Māori, Asian and Pasifika peoples, resulting in  
42 11 items for the subscale. This step improved overall fit to the Rasch model, however, the RMSEA  
43 was still greater than the acceptable value of 0.02 and internal consistency unacceptably low (Table 2:  
44 analysis 2).  
45  
46  
47  
48  
49  
50  
51

52  
53  
54 After items were split all item fit residuals were within range, although two still had statistically  
55 significant chi-square values (items 24NZE and item 8). Table 3 shows that the easiest item to endorse  
56  
57  
58

1  
2  
3 is item 16 and the hardest to endorse is item 13. The split item locations show that for children with  
4 the same level of emotional problems item 16 is more readily endorsed when they are Māori and less  
5 readily endorsed when they are Pasifika (difference of 0.42 logits). Item 24 is endorsed more readily  
6  
7 by parents of Asian than NZE children (difference of 0.49 logits). Figure 2 displays the targeting of  
8  
9 the subscale to the population, clearly demonstrating the large number of extreme cases.  
10  
11  
12  
13  
14

### 15 **Conduct Problems subscale**

16  
17 Conduct Problems item thresholds were ordered, items were locally independent, person fit and  
18  
19 unidimensionality were acceptable. However, overall fit to the model was unsatisfactory (RMSEA  
20  
21  $>0.02$ , Table 2: analysis 3). Internal consistency was poor (PSI 0.10,  $\alpha$  0.65) with the subscale being  
22  
23 able to discriminate between three strata.  
24

25 Item fit residuals were within acceptable range though two had significant chi-squares (items 5 and  
26  
27 18).  
28

29 Statistically significant DIF by ethnicity was present for item 12 and by gender for item 7. These two  
30  
31 items were split by ethnicity and gender respectively (Table 2: analysis 4), resulting in satisfactory fit  
32  
33 residuals, one item with a significant chi-square, significant improvement in RMSEA (0.03) but poor  
34  
35 internal consistency (PSI=0.11, splitting items leads to missing data and  $\alpha$  cannot be calculated).  
36

37 The easiest item to endorse was item 5 and the hardest item 12 (Table 3). The split item locations  
38  
39 show that for children with the same level of conduct problems item 12 is more readily endorsed  
40  
41 when they are Pasifika and less readily endorsed when they are NZE (difference of 1.22 logits). Item  
42  
43 7 is endorsed more readily by parents of boys than girls (difference of 0.32 logits). Targeting showed  
44  
45 a floor effect (Figure 2).  
46  
47  
48

### 49 **Hyperactivity subscale**

50  
51 Ordered thresholds, local independence, person fit and unidimensionality were observed for the  
52  
53 Hyperactivity subscale; however, overall fit to the model and internal consistency was unsatisfactory  
54  
55 (RMSE  $>0.02$ ; PSI 0.30,  $\alpha$  0.48; subscale discriminates between 3 strata, Table 2: analysis 5). Item fit  
56  
57  
58  
59  
60

1  
2  
3 residuals were out of range for item 21 and item 25 had a significant chi-square. Uniform DIF was  
4 statistically significant by ethnicity in two items (15 and 21). These items were therefore split by  
5 ethnicity. This improved fit to the Rasch model (Table 2: analysis 6) and displayed better fit than  
6  
7 when these two items were combined into a testlet. Item fit residuals were within acceptable range of  
8  
9  
10 -2.5/+2.5; only one item had a significant item chi-square statistic (Table 3), and RMSEA was close to  
11  
12 0.02. However, internal consistency remained poor (PSI=0.31). The easiest item to endorse was item  
13  
14 15 (for Asian children) and the hardest item 10. The split item locations show that, for children with  
15  
16 the same level of hyperactivity problems, item 15 is more readily endorsed when they are Asian and  
17  
18 less readily endorsed when they are NZE (difference of 0.52 logits). Item 21 is endorsed more readily  
19  
20 by parents of NZE children than Pasifika children (difference of 0.47 logits, table 3). The targeting  
21  
22 map showed a floor effect (Figure 2).  
23  
24  
25

### 26 27 **Peer problems subscale**

28  
29 Ordered thresholds, local independence, person fit and unidimensionality were observed. However,  
30  
31 overall fit to the Rasch model and internal consistency were unsatisfactory (RMSEA >0.02; PSI  
32  
33 negative value,  $\alpha$  0.51, the subscale is able to discriminate between two strata, Table 2: analysis 7).  
34  
35 Item fit residuals were acceptable, although two items had significant chi-squares. One item (23)  
36  
37 displayed uniform DIF by ethnicity. After splitting this item by ethnicity, fit improved; all item fit  
38  
39 residuals were within range (item 14 chi-square was borderline statistically significant), RMSEA was  
40  
41 close to 0.02. PSI values remained negative, however (Table 2: analysis 8). The easiest item was item  
42  
43 23 (for Asian children) and the hardest item 14. Item 23 was easier for Asian children and hardest for  
44  
45 NZE children (difference of 1.10 logits, Table 3). Targeting showed a significant floor effect (Figure  
46  
47 2).  
48  
49  
50

### 51 **Prosocial subscale**

52  
53 The subscale met the requirements for threshold ordering, local independence, person fit and  
54  
55 unidimensionality. Overall fit to the Rasch model and internal consistency were unsatisfactory  
56  
57  
58  
59  
60

1  
2  
3 (RMSEA >0.02; PSI negative values,  $\alpha$  0.29, subscale able to discriminate between two strata, Table  
4 2: analysis 9). Item fit residuals were within the -2.5/+2.5 range, though two had significant item chi-  
5 square statistics. There was no DIF. Item 17 was the easiest to endorse; item 4 was the hardest to  
6 endorse. A ceiling effect was observed in the person-item-threshold map (Figure 2).  
7  
8  
9

### 10 11 12 13 **Difficulty scale**

14 Two items had disordered thresholds, however, this was not statistically significant and item response  
15 categories did not need to be combined. Some local dependency was present in two item pairs.

16  
17 Unidimensionality was observed (Table 2: analysis 10). Five item fit residuals were out of the  
18 acceptable range of -2.5/+2.5 and four items showed uniform DIF by ethnicity (items 12, 16, 21 and  
19 23). To examine whether DIF was present at the test level these items were combined into a testlet.

20  
21 This resulted in an absence of DIF, however, one item pair remained locally dependent (items 2 and  
22 10). A second testlet was created to deal with this local dependency. The resulting scale was  
23 unidimensional, with locally independent items (Table 2: analysis 11). The RMSEA was within range  
24 suggesting overall fit to the Rasch model. Internal consistency was good (PSI 0.71,  $\alpha$  0.77, the scale  
25 was able to discriminate between six distinct strata). The fit residual for one item was slightly out of  
26 range (item 15, -2.777), however, given the negative value of this residual this indicates redundancy  
27 rather than misfit and the item was therefore retained. The easiest item to endorse was item 15, the  
28 hardest item 14. The person-item threshold map showed a normal distribution, although located to the  
29 left of the item locations on the latent trait. A conversion table was produced, which can be used to  
30 convert the raw ordinal score to an interval scale (Table 4).  
31  
32  
33  
34  
35  
36  
37  
38  
39  
40  
41  
42  
43  
44  
45  
46  
47

### 48 **Discussion**

49  
50  
51  
52 This study has shown that the SDQ items response categories work well, however, the five subscales  
53 diverge significantly from the Rasch model and four SDQ subscales include items that are biased by  
54 key variables with ethnicity having the greatest contribution. This raises critical questions about  
55  
56  
57  
58  
59  
60

1  
2  
3 cultural equivalence. The five subscales suffer from a floor and ceiling effect and their internal  
4 consistency statistics are well below the acceptable range. By contrast, the total Difficulty scale,  
5 which combines the four subscales capturing children's problems, is unidimensional, fits the Rasch  
6 model (after dealing with DIF and local dependency) and has internal consistency sufficient to  
7 distinguish between six groups of children. The study has also shown that parents and teachers score  
8 children in their care differently. Thus, all three study hypotheses are rejected. This section will  
9 discuss our findings in terms of fit to the Rasch model, internal consistency, cultural equivalence and  
10 cross-informant reliability.  
11  
12  
13  
14  
15  
16  
17  
18  
19

### 20 *Fit to the Rasch model*

21  
22  
23 The total Difficulty scale did fit the Rasch model, after dealing with four DIF items and two locally  
24 dependent items. This scale has good internal consistency and is able to discriminate between six  
25 groups of children on the latent trait. We observed the population distribution, whilst following a  
26 normal pattern, was to the left of the item locations on the latent trait. Thus, the precision of person  
27 estimates at the lower of the scale will not be as good as for those at the higher end of the scale.  
28  
29 However, the SDQ is used for screening and arguably precise measurement at the lower end is not  
30 needed, since all one needs to establish is that the child does not need to be referred for further  
31 assessment or intervention. As we achieved fit to the Rasch model we were able to provide a  
32 conversion table which can be used by clinicians to convert the raw ordinal score to more accurate  
33 interval level and which takes account of DIF.  
34  
35  
36  
37  
38  
39  
40  
41  
42  
43  
44  
45

### 46 *Internal consistency*

47  
48 The 5 subscales are relatively short, which affects internal consistency and the subscales' ability to  
49 make fine distinctions between groups of people on the underlying trait.<sup>25</sup> In addition, there was  
50 significant divergence between the PSI and Cronbach's alpha statistics, with PSI being much smaller  
51 than alpha. This divergence can be explained by the way these statistics are calculated. The  
52 calculation of Cronbach's alpha assumes all standard errors (SEs) for individuals are the same,  
53  
54  
55  
56  
57  
58  
59  
60

1  
2  
3 making it not a very robust statistics for skewed data.<sup>45</sup> This assumption results in relatively high  
4 values even in the presence of extreme scores and the Cronbach alpha values are therefore  
5 meaningless for SDQ data. This issue has not been raised in the SDQ literature; indeed, Cronbach's  
6 alpha values are widely reported as satisfactory.<sup>49</sup> In Rasch analysis the SE for every individual is  
7 estimated and the calculation of the PSI statistic takes these into account. Since SEs are largest for  
8 people with extreme scores, PSI will be smaller than Cronbach's alpha as observed in our skewed  
9 data. However, the purpose of the SDQ is to identify those children who would benefit from further  
10 assessment or intervention. Thus, the fact that we observed a floor and ceiling effect is not necessarily  
11 problematic.

### 22 *Cultural equivalence*

23  
24 This study examined invariance by ethnicity at the item level and found lack of cultural equivalence.  
25 DIF (especially by ethnicity) was found for all the four subscales measuring problems, suggesting  
26 there are a number of questions to which parents respond differently despite overall scoring the same  
27 amount of problems on the trait being measured. The only other Rasch analysis study we were able to  
28 locate (conducted on data from children aged 12 to 18) did not include a DIF analysis and thus we  
29 cannot compare our findings against theirs.<sup>24</sup> Lack of measurement invariance of the subscales has  
30 also been shown by others (albeit on older children than in our sample) when using a CFA approach.<sup>50</sup>  
31  
32  
33  
34  
35  
36  
37  
38  
39  
40  
41  
42  
43  
44  
45  
46  
47  
48  
49  
50  
51  
52  
53  
54  
55  
56  
57  
58  
59  
60  
<sup>51</sup> Richter et al. found varying factor loadings and thresholds between different ethnic Norwegians  
and minority ethnic groups of adolescents and concluded that the total difficulty score is a  
preferable.<sup>50</sup> Similarly, Ortuño-Sierra et al. demonstrated that measurement variance was only partial,  
with 11 of the 25 items not being variant across different European samples.<sup>51</sup> By contrast, others  
have shown measurement invariance between British Indian and British white children using multi-  
group confirmatory factor analyses and demonstrated evidence of acceptable fit across ethnicity,  
although again their population was older (5 to 16 years) than the sample considered here.<sup>52</sup>

1  
2  
3 If measurement variance (DIF) is ignored, the child's difficulties can be over- or underestimated since  
4 the difficulty of the item varies by ethnic group, potentially leading to inaccurate identification of  
5 cases. This is important, given caseness has been shown to vary for different ethnic groups within the  
6 same country, and between countries.<sup>53-55</sup> Our study is unable to assess why such DIF occurs, since  
7 the study drew on secondary data. However, we can pose some possible factors that may have  
8 affected measurement variance, as discussed below.  
9  
10  
11  
12  
13  
14  
15

16  
17 Our recent qualitative study suggests there is variation in the way the SDQ is administered – some  
18 parents complete the tool by themselves and others receive support from nurses, possibly impacting  
19 on the way questions are interpreted.<sup>29</sup> In addition, New Zealand pre-school parents from Māori,  
20 Pacific Island, Asian, and new immigrant groups questioned the cultural validity of the SDQ.<sup>29</sup>  
21 Respondents in an Australian qualitative study exploring the SDQ in Aboriginal community-  
22 controlled health services reported that the use of a questionnaire as opposed to a general conversation  
23 or interview was deemed culturally inappropriate and that inter-relationships with peers were  
24 considered of less importance than relationships with family and participants.<sup>56</sup>  
25  
26  
27  
28  
29  
30  
31  
32  
33

34 There are 85 different language versions available from the Youth in Mind website, though not one in  
35 Te Reo Māori (<http://www.sdqinfo.org/>). Translations and adaptations are not permitted without the  
36 involvement of that study team, which provides confidence in the robustness of translations.  
37  
38

39 However, for our study we do not know whether respondents were offered the SDQ in the language of  
40 their choice, as such data are not collected as part of the B4SC. The literature includes six studies that  
41 examined and demonstrated some issues with SDQ translations.<sup>13</sup> Using a language version that is not  
42 understood by respondents will affect validity,<sup>57</sup> which may have occurred here.  
43  
44  
45  
46  
47  
48  
49

50 It is possible that poor literacy impacts on answering the SDQ, as found by others.<sup>58 59</sup> In New  
51 Zealand there are many people (in proportion) with poorer than average literacy skills.<sup>60</sup> In addition,  
52 18.6% of the New Zealand population report speaking two or more languages, the majority being born  
53 overseas (60.4%); many among these will have English as a second language.<sup>61</sup>  
54  
55  
56  
57  
58  
59  
60

1  
2  
3  
4  
5 These aspects have particular relevance for Māori whānau (extended families) in New Zealand where  
6 is it estimated that 20% of Māori children and youth have Conduct problems.<sup>62</sup> Therefore, it is  
7 important that screening of Māori children during the preschool years is accurate in ensuring that  
8 Māori whānau both receive the support they need and at the same time are not pathologised by false  
9 positive findings. The 2013 New Zealand Census found that 21% of the almost 700,000 Māori  
10 population could hold conversation about everyday things in Te Reo Māori, which has been a national  
11 official language since 1987.<sup>63</sup> Yet, there is not Māori version of the SDQ, or a New Zealand version  
12 incorporating commonly used Māori words.  
13  
14  
15  
16  
17  
18  
19  
20  
21  
22  
23

### 24 *Cross-informant reliability*

25  
26 Cross-informant reliability was examined with ICCs which were well below the acceptable cut-off  
27 value of 0.6 (the mean in our study was 0.126). However, some argue that correlation coefficients can  
28 be used in the assessment of cross-informant reliability of the SDQ since parents and teachers make  
29 SDQ ratings based on different sources of information.<sup>7,49</sup> Our systematic literature review found  
30 weighted averages of coefficients between different informants ranged from 0.24 to 0.45,<sup>13</sup> similar to  
31 findings by others (range 0.26 to 0.47).<sup>49</sup> In our study the mean correlation coefficient was 0.28,  
32 meaning only 8% of the variance can be explained by scores from different informants. This implies  
33 the importance of taking into account the views of both parents and teachers when making a decision  
34 for onward referral, a practice that is not commonplace in New Zealand.<sup>64</sup>  
35  
36  
37  
38  
39  
40  
41  
42  
43  
44  
45

46 A key strength of this study is the inclusion of all pre-school children in New Zealand for whom an  
47 SDQ assessment was available in 2011, resulting in our ability to assess the validity of the tool at the  
48 population level, with sufficient power to make sounds conclusions and ability to generalise to the  
49 wider New Zealand pre-school population. Another strength was robust data quality checks, and the  
50 exclusion of 39% of cases for which we had some concerns about quality (it being incomplete or  
51  
52  
53  
54  
55  
56  
57  
58  
59  
60



1  
2  
3 containing multiple inconsistencies). From our steering group meetings we gathered that there were a  
4 few reasons underlying these quality issues. In some DHBs staff enter only the total scores, as  
5 opposed to item-level data. This practice leads to potential summing errors of total scores and these  
6 could not be checked, or indeed analysed (hence we excluded these cases). Secondly, some DHBs  
7 told us they set the default values of answers as zero rather than blank. Consequently, when there  
8 were missing data (for example if a teacher-completed SDQ was not available), the software would  
9 have summed these and arrived at total scores of zero. Given that the Prosocial scale is scored in the  
10 opposite direction of the others, zero scores on all subscales would be highly inconsistent and  
11 therefore shed doubt on data quality (and hence these were also excluded). An additional limitation  
12 was our inability to assess DIF by other key variables that may affect validity, e.g. first language or  
13 country of birth, as such data were not available.  
14  
15  
16  
17  
18  
19  
20  
21  
22  
23  
24  
25

26 In conclusion, the total Difficulty scale is internally valid and has acceptable internal consistency.  
27 Clinicians should use the conversion table as it accounts for bias by ethnic group. The five subscales  
28 are not valid and not suitable for use in their own right in New Zealand. Since consistency of scores  
29 between parents and teachers was poor it is advisable to use both parents and teachers' feedback when  
30 considering children's needs for referral to further assessment. Future work should examine whether  
31 validity is affected by different language versions used (in the same country).  
32  
33  
34  
35  
36  
37  
38  
39  
40  
41  
42  
43  
44  
45  
46  
47  
48  
49  
50  
51  
52  
53  
54  
55  
56  
57  
58  
59  
60

### Author contributions

PK conceived of the study, led on study design, project management, data analysis and dissemination. AV, HE, KMcP contributed to study design. AV contributed to the data analysis. PK drafted the manuscript and is the guarantor. All authors revised it critically for important intellectual content and approved the final version for publication. All authors agree to be accountable for all aspects of the work.

### Competing Interests

All authors have completed the ICMJE uniform disclosure form at [www.icmje.org/coi\\_disclosure.pdf](http://www.icmje.org/coi_disclosure.pdf) and declare: PK, AV, HE, KMcP had financial support from the Ministry of Health of New Zealand for the submitted work; subsequent to the completion of this project and data analysis KMcP became the Chief Executive of the Health Research Council of New Zealand; all other authors declare no financial relationships with any organisations that might have an interest in the submitted work in the previous three years; no other relationships or activities that could appear to have influenced the submitted work. The views and opinions expressed in this article are those of the authors and do not necessarily reflect the official policy or position of the funder.

### Data sharing

Quantitative data from the study can be obtained from the author, subject to the funder's permission.

1  
2  
3 **Figure 1.** Item Characteristics Curves for items from the Strengths and Difficulties

4  
5 Questionnaire (parents, n=1,000)  
6  
7  
8  
9  
10  
11  
12  
13  
14  
15  
16  
17  
18  
19  
20  
21  
22  
23  
24  
25  
26  
27  
28  
29  
30  
31  
32  
33  
34  
35  
36  
37  
38  
39  
40  
41  
42  
43  
44  
45  
46  
47  
48  
49  
50  
51  
52  
53  
54  
55  
56  
57  
58  
59  
60

For peer review only

1  
2  
3 **Figure 2.** Person-item-threshold maps Strengths and Difficulties Questionnaire (parents,  
4  
5 n=1,000)  
6  
7  
8  
9  
10  
11  
12  
13  
14  
15  
16  
17  
18  
19  
20  
21  
22  
23  
24  
25  
26  
27  
28  
29  
30  
31  
32  
33  
34  
35  
36  
37  
38  
39  
40  
41  
42  
43  
44  
45  
46  
47  
48  
49  
50  
51  
52  
53  
54  
55  
56  
57  
58  
59  
60

For peer review only

**Box 1.** Calculation of Root Mean Square Error of Approximation (RMSEA)

---

In Rasch analysis, RMSEA is calculated as follows:

$$\text{RMSEA} = \sqrt{[(\chi^2/\text{df}) - 1]/(N - 1), 0}^{32}$$

*$\chi^2$  is the item-trait interaction chi-square (obtained from the analysis within the Rasch software),*

*df is its degrees of freedom*

*N is the sample size.*

*Notice that the RMSEA has an expected value of zero when the data fit the model. Overfit of the data to the model,  $\chi^2/\text{df} < 1$ , is ignored. For a given  $\chi^2$ , RMSEA decreases as sample size (N) increases.*

---

**Table 1.** Intraclass correlation coefficients SDQ subscales, overall and by ethnicity  
(n=17,006)

| Variable                  | Ethnicity |       |                 |          |       |
|---------------------------|-----------|-------|-----------------|----------|-------|
|                           | Overall*  | Māori | NZ<br>European* | Pasifika | Asian |
|                           | r         | r     | r               | r        | r     |
| Valid N                   | 17056     | 2677  | 10735           | 1144     | 1169  |
| Mean item correlations    | 0.282     | 0.237 | 0.315           | 0.130    | 0.210 |
| Minimum item correlations | 0.199     | 0.151 | 0.220           | -0.009   | 0.055 |
| Maximum item correlations | 0.418     | 0.358 | 0.447           | 0.275    | 0.377 |
|                           | ICC       | ICC   | ICC             | ICC      | ICC   |
| Emotional Symptoms        | 0.126     | 0.067 | 0.186           | 0.017    | 0.098 |
| Conduct Problems          | 0.137     | 0.112 | 0.179           | 0.038    | 0.079 |
| Hyperactivity             | 0.174     | 0.136 | 0.245           | 0.050    | 0.122 |
| Peer problems             | 0.139     | 0.100 | 0.202           | 0.004    | 0.162 |
| Prosocial                 | 0.055     | 0.048 | 0.066           | 0.040    | 0.035 |
| Mean ICC                  | 0.126     | 0.093 | 0.175           | 0.030    | 0.099 |
| Minimum ICC               | 0.055     | 0.048 | 0.066           | 0.004    | 0.035 |
| Maximum ICC               | 0.174     | 0.136 | 0.245           | 0.050    | 0.162 |

**Table 2.** Fit to the Rasch model – Strengths and Difficulties Questionnaire parents (SDQ-P) (n=1,000)

| Subscales                 |                      | Item Fit Residual |                   | Person Fit Residual |        | Chi Square Interaction |       |    | RMSEA <sup>%</sup> | Internal consistency <sup>§</sup> |                  | Unidimensionality          |                   |  |
|---------------------------|----------------------|-------------------|-------------------|---------------------|--------|------------------------|-------|----|--------------------|-----------------------------------|------------------|----------------------------|-------------------|--|
|                           |                      | N                 | Mean <sup>§</sup> | SD                  | Mean   | SD                     | Value | df | P                  | PSI                               | $\alpha$         | T-Tests (CI) <sup>§§</sup> |                   |  |
| Analysis name             |                      |                   |                   |                     |        |                        |       |    |                    | Without extremes                  | Without extremes | % (95% CI)                 |                   |  |
| <b>Emotional Symptoms</b> |                      |                   |                   |                     |        |                        |       |    |                    |                                   |                  |                            |                   |  |
| 1                         | Initial              | 1,000             | -0.791            | 0.894               | -0.327 | 0.783                  | 83.6  | 20 | <0.0001            | 0.068                             | -0.40            | 0.15                       | 0                 |  |
| 2                         | Split items<br>16&24 | 1,000             | -0.545            | 0.841               | -0.343 | 0.735                  | 99.1  | 41 | <0.0001            | 0.045                             | -0.41            | -                          | 0                 |  |
| <b>Conduct Problems</b>   |                      |                   |                   |                     |        |                        |       |    |                    |                                   |                  |                            |                   |  |
| 3                         | Initial              | 1,000             | 0.266             | 1.273               | -0.253 | 0.876                  | 71.6  | 20 | <0.0001            | 0.060                             | 0.10             | 0.65                       | 0                 |  |
| 4                         | Split items<br>7&12  | 1,000             | 0.134             | 0.902               | -0.254 | 0.882                  | 75.3  | 45 | 0.003              | 0.031                             | 0.11             | -                          | 0                 |  |
| <b>Hyper-activity</b>     |                      |                   |                   |                     |        |                        |       |    |                    |                                   |                  |                            |                   |  |
| 5                         | Initial              | 1,000             | 0.260             | 2.348               | -0.359 | 1.147                  | 97.3  | 25 | <0.0001            | 0.06                              | 0.30             | 0.48                       | 0.5 (-1.0 to 2.0) |  |
| 6                         | Split<br>items 15&21 | 1,000             | 0.323             | 1.480               | -0.365 | 1.134                  | 125.6 | 69 | <0.0001            | 0.03                              | 0.31             | -                          | 0.5 (-1.0 to 2.0) |  |
| <b>Peer Problems</b>      |                      |                   |                   |                     |        |                        |       |    |                    |                                   |                  |                            |                   |  |

1  
2  
3  
4  
5  
6  
7  
8  
9  
10  
11  
12  
13  
14  
15  
16  
17  
18  
19  
20  
21  
22  
23  
24  
25  
26  
27  
28  
29  
30  
31  
32  
33  
34  
35  
36  
37  
38  
39  
40  
41  
42  
43  
44  
45  
46  
47

|    |                          |       |        |       |        |       |       |     |         |      |       |      |                   |
|----|--------------------------|-------|--------|-------|--------|-------|-------|-----|---------|------|-------|------|-------------------|
| 7  | Initial                  | 1,000 | -0.339 | 0.868 | -0.207 | 0.719 | 69.0  | 20  | <0.0001 | 0.06 | -0.49 | 0.51 | 0                 |
| 8  | Split item               | 1,000 | -0.207 | 0.652 | -0.213 | 0.733 | 79.5  | 52  | 0.008   | 0.03 | -0.43 | -    | 0                 |
|    | 23                       |       |        |       |        |       |       |     |         |      |       |      |                   |
|    | <b>Prosocial</b>         |       |        |       |        |       |       |     |         |      |       |      |                   |
| 9  | Initial                  | 1,000 | -0.075 | 1.592 | -0.319 | 1.079 | 66.6  | 20  | <0.0001 | 0.06 | -0.03 | 0.29 | 0.1 (-1.5 to 1.8) |
|    | <b>Difficulty</b>        |       |        |       |        |       |       |     |         |      |       |      |                   |
| 10 | Initial                  | 1,000 | -0.448 | 1.848 | -0.248 | 1.004 | 296.3 | 180 | 0.0001  | 0.03 | 0.71  | 0.79 | 5.9 (4.6 to 7.3)  |
| 11 | Testlets                 | 1,000 | -0.615 | 1.321 | -0.294 | 0.985 | 200.4 | 144 | 0.001   | 0.02 | 0.71  | 0.77 | 3.0 (1.6 to 4.4)  |
|    | DIF <sup>%%</sup>        |       |        |       |        |       |       |     |         |      |       |      |                   |
|    | items &                  |       |        |       |        |       |       |     |         |      |       |      |                   |
|    | LD <sup>\$\$</sup> items |       |        |       |        |       |       |     |         |      |       |      |                   |

**Note - Indices indicative of fit:**

- <sup>\$</sup> Mean item and person fit residuals: should be close to 0 (and <0.4); SD close to 1 (and <1.4)
- <sup>%</sup> RMSEA (Root Mean Square Error of Approximation) <0.02
- <sup>§</sup> Internal consistency PSI and  $\alpha \geq 0.70$  (allows for group comparisons) and  $\geq 0.85$  (allows for individual clinical use)
- <sup>\$\$</sup> Unidimensionality indicated if fewer than 5% of t-tests are significant (i.e. the 95% CI should include 5%)
- <sup>%%</sup> DIF: Differential item Functioning
- <sup>\$\$</sup> LD: Local Dependency



**Table 3.** Item locations (in location order) and fit statistics Strengths and Difficulties Questionnaire parents (SDQ-P) subscales (n=1,000)

| Subscale & Items                       | Location | SE    | Fit Residual | Chi Square value | df | P      |
|----------------------------------------|----------|-------|--------------|------------------|----|--------|
| <b>Emotional problems <sup>s</sup></b> |          |       |              |                  |    |        |
| 16 Māori                               | -0.871   | 0.113 | -0.226       | 2.968            | 4  | 0.5631 |
| 16 NZE                                 | -0.692   | 0.124 | -0.036       | 0.60             | 3  | 0.8960 |
| 16 Asian                               | -0.538   | 0.118 | -0.101       | 0.77             | 3  | 0.8569 |
| 16 Pasifika                            | -0.450   | 0.120 | 0.911        | 0.61             | 3  | 0.8936 |
| 24 Asian                               | -0.250   | 0.124 | -0.185       | 5.13             | 3  | 0.1629 |
| 24 Māori                               | 0.010    | 0.117 | -0.737       | 9.69             | 4  | 0.0461 |
| 24 Pasifika                            | 0.024    | 0.124 | -0.002       | 11.857           | 3  | 0.0079 |
| 24 NZE                                 | 0.243    | 0.127 | -1.610       | 14.095           | 3  | 0.0028 |
| 3                                      | 0.653    | 0.070 | -0.615       | 15.156           | 5  | 0.0097 |
| 8                                      | 0.908    | 0.075 | -1.970       | 21.479           | 5  | 0.0007 |
| 13                                     | 0.965    | 0.080 | -1.423       | 16.749           | 5  | 0.0050 |
| <b>Conduct Problems <sup>%</sup></b>   |          |       |              |                  |    |        |
| 5                                      | -0.985   | 0.063 | 0.011        | 15.38            | 5  | 0.0089 |
| 18                                     | -0.707   | 0.066 | -0.352       | 22.19            | 5  | 0.0005 |
| 7 Male                                 | -0.594   | 0.096 | 1.209        | 7.71             | 5  | 0.1732 |
| 7 Fem                                  | -0.271   | 0.100 | 1.917        | 6.09             | 5  | 0.2975 |
| 22                                     | -0.012   | 0.072 | 0.156        | 8.49             | 5  | 0.1312 |
| 12 Pasifika                            | 0.089    | 0.143 | -0.148       | 3.527            | 5  | 0.6193 |
| 12 Māori                               | 0.339    | 0.145 | -0.512       | 5.862            | 5  | 0.3199 |
| 12 Asian                               | 0.838    | 0.202 | -0.030       | 2.344            | 5  | 0.7998 |
| 12 NZE                                 | 1.304    | 0.211 | -1.049       | 3.733            | 5  | 0.5884 |
| <b>Hyperactivity <sup>s</sup></b>      |          |       |              |                  |    |        |
| 15Asian                                | -0.491   | 0.109 | -0.395       | 8.25             | 5  | 0.1432 |
| 15 Māori                               | -0.315   | 0.117 | 0.433        | 1.78             | 6  | 0.9388 |

|    |                                 |        |       |        |        |   |        |
|----|---------------------------------|--------|-------|--------|--------|---|--------|
| 1  |                                 |        |       |        |        |   |        |
| 2  |                                 |        |       |        |        |   |        |
| 3  | 21 NZE                          | -0.234 | 0.142 | 2.204  | 17.50  | 5 | 0.0037 |
| 4  | 2                               | -0.206 | 0.056 | -1.327 | 23.29  | 9 | 0.0056 |
| 5  |                                 |        |       |        |        |   |        |
| 6  | 21 Asian                        | -0.186 | 0.124 | 1.414  | 8.216  | 5 | 0.1447 |
| 7  |                                 |        |       |        |        |   |        |
| 8  | 15 Pasifika                     | -0.019 | 0.121 | 0.388  | 8.775  | 5 | 0.1184 |
| 9  |                                 |        |       |        |        |   |        |
| 10 | 15 NZE                          | 0.032  | 0.126 | -1.737 | 12.772 | 5 | 0.0256 |
| 11 |                                 |        |       |        |        |   |        |
| 12 | 21 Māori                        | 0.114  | 0.129 | 1.743  | 7.403  | 6 | 0.2852 |
| 13 |                                 |        |       |        |        |   |        |
| 14 | 21 Pasifika                     | 0.234  | 0.122 | 1.393  | 5.986  | 5 | 0.3076 |
| 15 | 25                              | 0.360  | 0.066 | 1.421  | 9.335  | 9 | 0.4070 |
| 16 |                                 |        |       |        |        |   |        |
| 17 | 10                              | 0.712  | 0.065 | -1.984 | 22.26  | 9 | 0.0081 |
| 18 |                                 |        |       |        |        |   |        |
| 19 | <b>Peer Problems %</b>          |        |       |        |        |   |        |
| 20 |                                 |        |       |        |        |   |        |
| 21 | 23 A                            | -0.968 | 0.109 | -0.571 | 1.959  | 4 | 0.7432 |
| 22 | 23 P                            | -0.870 | 0.107 | 0.307  | 4.311  | 5 | 0.5056 |
| 23 |                                 |        |       |        |        |   |        |
| 24 | 23 M                            | -0.217 | 0.119 | 0.038  | 5.529  | 4 | 0.2372 |
| 25 |                                 |        |       |        |        |   |        |
| 26 | 6                               | -0.026 | 0.065 | 0.526  | 10.572 | 9 | 0.3062 |
| 27 |                                 |        |       |        |        |   |        |
| 28 | 23 N                            | 0.130  | 0.154 | 0.093  | 3.548  | 3 | 0.3147 |
| 29 |                                 |        |       |        |        |   |        |
| 30 | 11                              | 0.233  | 0.066 | -1.419 | 17.787 | 9 | 0.0377 |
| 31 | 19                              | 0.491  | 0.071 | 0.131  | 12.305 | 9 | 0.1967 |
| 32 |                                 |        |       |        |        |   |        |
| 33 | 14                              | 1.227  | 0.084 | -0.763 | 23.501 | 9 | 0.0052 |
| 34 |                                 |        |       |        |        |   |        |
| 35 | <b>Prosocial §</b>              |        |       |        |        |   |        |
| 36 |                                 |        |       |        |        |   |        |
| 37 | 1                               | -0.487 | 0.079 | -1.530 | 18.205 | 4 | 0.0011 |
| 38 | 4                               | -0.036 | 0.073 | -0.273 | 12.624 | 4 | 0.0133 |
| 39 |                                 |        |       |        |        |   |        |
| 40 | 9                               | 0.000  | 0.072 | 1.092  | 6.74   | 4 | 0.1502 |
| 41 |                                 |        |       |        |        |   |        |
| 42 | 17                              | 0.008  | 0.071 | -1.633 | 21.52  | 4 | 0.0003 |
| 43 |                                 |        |       |        |        |   |        |
| 44 | 20                              | 0.515  | 0.073 | 1.972  | 7.52   | 4 | 0.1109 |
| 45 |                                 |        |       |        |        |   |        |
| 46 | <b>Difficulty <sup>ss</sup></b> |        |       |        |        |   |        |
| 47 |                                 |        |       |        |        |   |        |
| 48 | 15                              | -0.835 | 0.054 | -2.777 | 27.39  | 9 | 0.0012 |
| 49 | LD items <sup>%%</sup>          | -0.606 | 0.037 | -1.744 | 14.01  | 9 | 0.1221 |
| 50 |                                 |        |       |        |        |   |        |
| 51 | 5                               | -0.583 | 0.056 | -0.595 | 8.71   | 9 | 0.4645 |
| 52 |                                 |        |       |        |        |   |        |
| 53 | DIF items <sup>ss</sup>         | -0.375 | 0.031 | -2.500 | 21.03  | 9 | 0.0125 |
| 54 |                                 |        |       |        |        |   |        |
| 55 | 25                              | -0.331 | 0.061 | 0.036  | 14.05  | 9 | 0.1207 |
| 56 |                                 |        |       |        |        |   |        |
| 57 |                                 |        |       |        |        |   |        |
| 58 |                                 |        |       |        |        |   |        |
| 59 |                                 |        |       |        |        |   |        |
| 60 |                                 |        |       |        |        |   |        |

|    |        |       |        |       |   |        |
|----|--------|-------|--------|-------|---|--------|
| 24 | -0.314 | 0.058 | 0.839  | 7.44  | 9 | 0.5911 |
| 18 | -0.313 | 0.059 | -0.742 | 6.83  | 9 | 0.6553 |
| 6  | -0.137 | 0.061 | 1.137  | 4.47  | 9 | 0.8777 |
| 7  | -0.026 | 0.063 | -1.305 | 23.26 | 9 | 0.0057 |
| 11 | 0.117  | 0.067 | 0.862  | 9.76  | 9 | 0.3702 |
| 22 | 0.308  | 0.068 | -1.218 | 14.07 | 9 | 0.1199 |
| 3  | 0.311  | 0.071 | 1.017  | 11.50 | 9 | 0.2433 |
| 19 | 0.413  | 0.072 | -1.247 | 10.59 | 9 | 0.3048 |
| 8  | 0.561  | 0.077 | 0.105  | 4.79  | 9 | 0.8525 |
| 13 | 0.646  | 0.087 | 0.621  | 9.37  | 9 | 0.4035 |
| 14 | 1.164  | 0.084 | -2.326 | 13.15 | 9 | 0.1560 |

---

*Note*

<sup>§</sup> Bonferroni corrections applied P is statistically significant if <0.005

<sup>%</sup> Bonferroni corrections applied P is statistically significant if <0.006

<sup>§</sup> Bonferroni corrections applied P is statistically significant if <0.01

<sup>§§</sup> Bonferroni corrections applied P is statistically significant if <0.003

<sup>%%</sup> LD (Locally Dependent) items; combined into a testlet (item 2 and 10)

<sup>§§</sup> DIF (Differential Item Functioning) items combined into a testlet (items 12, 16, 21, 23)

**Table 4.** Conversion table for the Difficulty scale of the Strengths and Difficulties Questionnaire parents (SDQ-P)

| <b>Original Total Difficulty score</b><br><b>(ordinal data)</b> | <b>Logit scores</b><br><b>(interval level data)</b> | <b>Converted logit scores to</b><br><b>0-40 scale</b><br><b>(interval level data)</b> |
|-----------------------------------------------------------------|-----------------------------------------------------|---------------------------------------------------------------------------------------|
| 0                                                               | -4.483                                              | 0                                                                                     |
| 1                                                               | -3.655                                              | 4                                                                                     |
| 2                                                               | -3.082                                              | 7                                                                                     |
| 3                                                               | -2.685                                              | 8                                                                                     |
| 4                                                               | -2.375                                              | 10                                                                                    |
| 5                                                               | -2.117                                              | 11                                                                                    |
| 6                                                               | -1.895                                              | 12                                                                                    |
| 7                                                               | -1.699                                              | 13                                                                                    |
| 8                                                               | -1.522                                              | 14                                                                                    |
| 9                                                               | -1.36                                               | 15                                                                                    |
| 10                                                              | -1.209                                              | 15                                                                                    |
| 11                                                              | -1.068                                              | 16                                                                                    |
| 12                                                              | -0.935                                              | 16                                                                                    |
| 13                                                              | -0.809                                              | 17                                                                                    |
| 14                                                              | -0.687                                              | 18                                                                                    |
| 15                                                              | -0.571                                              | 18                                                                                    |
| 16                                                              | -0.457                                              | 19                                                                                    |
| 17                                                              | -0.347                                              | 19                                                                                    |
| 18                                                              | -0.24                                               | 20                                                                                    |
| 19                                                              | -0.134                                              | 20                                                                                    |
| 20                                                              | -0.029                                              | 21                                                                                    |
| 21                                                              | 0.075                                               | 21                                                                                    |
| 22                                                              | 0.178                                               | 22                                                                                    |
| 23                                                              | 0.282                                               | 22                                                                                    |

|    |       |    |
|----|-------|----|
| 24 | 0.386 | 23 |
| 25 | 0.492 | 23 |
| 26 | 0.599 | 24 |
| 27 | 0.709 | 24 |
| 28 | 0.822 | 25 |
| 29 | 0.94  | 25 |
| 30 | 1.064 | 26 |
| 31 | 1.196 | 26 |
| 32 | 1.337 | 27 |
| 33 | 1.491 | 28 |
| 34 | 1.663 | 29 |
| 35 | 1.859 | 29 |
| 36 | 2.09  | 31 |
| 37 | 2.373 | 32 |
| 38 | 2.746 | 34 |
| 39 | 3.301 | 36 |
| 40 | 4.125 | 40 |

---

## References

1. Eivers AR, Brendgen M, Borge AIH. Stability and change in prosocial and antisocial behavior across the transition to school: Teacher and peer perspectives. *Early Education and Development* 2010;**21**(6):843-64.
2. White J, Connelly G, Thompson L, et al. Assessing wellbeing at school entry using the Strengths and Difficulties Questionnaire: Professional perspectives. *Educational Research* 2013;**55**(1):87-98.
3. Kim-Cohen J, Caspi A, Moffitt TE, et al. Prior juvenile diagnoses in adults with mental disorder: Developmental follow-back of a prospective-longitudinal cohort. *Archives of General Psychiatry* 2003;**60**(7):709-17.
4. Kim-Cohen J, Arseneault L, Newcombe R, et al. Five-year predictive validity of DSM-IV conduct disorder research diagnosis in 41/2-5-year-old children. *European Child and Adolescent Psychiatry* 2009;**18**(5):284-91.
5. Bierman KL, Coie J, Dodge K, et al. School Outcomes of Aggressive-Disruptive Children: Prediction From Kindergarten Risk Factors and Impact of the Fast Track Prevention Program. *Aggressive Behavior* 2013;**39**(2):114-30.
6. Doughty C. The effectiveness of mental health promotion, prevention and early intervention in children, adolescents and adults. *NZHTA Report* ; 8(2). 2005.
7. Goodman R. The strengths and difficulties questionnaire: A research note. *Journal of Child Psychology and Psychiatry and Allied Disciplines* 1997;**38**(5):581-86.
8. Goodman R, Meltzer H, Bailey V. The Strengths and Difficulties Questionnaire: a pilot study on the validity of the self-report version. *European Child & Adolescent Psychiatry* 1998;**7**(3):125-30.
9. Ministry of Health. *The B4 School Check. A handbook for practitioners.* Wellington, 2008.
10. Williamson A, Este C, Clapham K, et al. What are the factors associated with good mental health among Aboriginal children in urban New South Wales, Australia? Phase I findings from the

- 1  
2  
3 Study of Environment on Aboriginal Resilience and Child Health (SEARCH). *BMJ Open*  
4  
5 2016;**6**(7).
- 6  
7 11. Embretson SE, Reise SP. *Item Response Theory for Psychologists*. London: Lawrence Erlbaum  
8  
9 Associates, Publishers, 2000.
- 10  
11 12. Cano S, Klassen AF, Scott A, et al. Health outcome and economic measurement in breast cancer  
12  
13 surgery: Challenges and opportunities. *Expert Review of Pharmacoeconomics and Outcomes*  
14  
15 *Research* 2010;**10**(5):583-94.
- 16  
17 13. Kersten P, Czuba K, McPherson KM, et al. A systematic review of evidence for the psychometric  
18  
19 properties of the Strengths and Difficulties Questionnaire. *International Journal of Behavioral*  
20  
21 *Development* 2016;**40**(1):64-75.
- 22  
23 14. Andrich D. A rating formulation for ordered response categories. *Psychometrika* 1978;**43**:561-73.
- 24  
25 15. Rasch G. *Probabilistic models for some intelligence and attainment tests (revised and expanded*  
26  
27 *ed.)*. Chicago: The University of Chicago Press, 1960/1980.
- 28  
29 16. Bond TG, Fox CM. *Applying the Rasch model. Fundamental measurement in the human sciences*.  
30  
31 London: Lawrence Erlbaum Associates, 2001.
- 32  
33 17. Klein AM, Otto Y, Fuchs S, et al. Psychometric properties of the parent-rated SDQ in  
34  
35 preschoolers. *European Journal of Psychological Assessment* 2013;**29**(2):96-104.
- 36  
37 18. Tobia V, Gabriele MA, Marzocchi GM. The Italian Version of the Strengths and Difficulties  
38  
39 Questionnaire (SDQ)-Teacher: Psychometric Properties. *Journal of Psychoeducational*  
40  
41 *Assessment* 2013;**31**(5):493-505.
- 42  
43 19. Mieloo CL, Bevaart F, Donker MC, et al. Validation of the SDQ in a multi-ethnic population of  
44  
45 young children. *The European Journal of Public Health* 2014;**24**(1):26-32.
- 46  
47 20. Borg A-M, Pälvi K, Raili S, et al. Reliability of the Strengths and Difficulties Questionnaire  
48  
49 among Finnish 4-9-year-old children. *Nordic Journal of Psychiatry* 2012;**66**(6):403-13.
- 50  
51 21. Goodman A, Lamping DL, Ploubidis GB. When to use broader internalising and externalising  
52  
53 subscales instead of the hypothesised five subscales on the strengths and difficulties  
54  
55 questionnaire (SDQ): Data from british parents, teachers and children. *Journal Of Abnormal*  
56  
57 *Child Psychology* 2010;**38**(8):1179-91.

- 1  
2  
3 22. Wright BD. Comparing Rasch measurement and factor analysis. *Structural Equation Modeling*  
4  
5 1996;**3**:3-24.  
6  
7 23. Christensen KB, Engelhard J, G., Salzberger T. Rasch vs. Factor Analysis. *Rasch Measurement*  
8  
9 *Transactions* 2012;**26**(3):1373-8.  
10  
11 24. Hagquist C. The psychometric properties of the self-reported SDQ - An analysis of Swedish data  
12  
13 based on the Rasch model. *Personality and Individual Differences* 2007;**43**(5):1289-301.  
14  
15 25. Streiner DL, Norman GR. *Health Measurement Scales: a practical guide to their development and*  
16  
17 *use*. Oxford: Oxford University Press, 2008.  
18  
19 26. Statistics New Zealand. Māori Population Estimates: Mean year ended 31 December 2016.  
20  
21 Secondary Māori Population Estimates: Mean year ended 31 December 2016 2016.  
22  
23 [http://www.stats.govt.nz/browse\\_for\\_stats/population/estimates\\_and\\_projections/MaoriPopul](http://www.stats.govt.nz/browse_for_stats/population/estimates_and_projections/MaoriPopulationEstimates_HOTPMYe31Dec16.aspx)  
24  
25 [ationEstimates\\_HOTPMYe31Dec16.aspx](http://www.stats.govt.nz/browse_for_stats/population/estimates_and_projections/MaoriPopulationEstimates_HOTPMYe31Dec16.aspx).  
26  
27 27. Høegh MC, Høegh S-M. Trans-adapting outcome measures in rehabilitation: Cross-cultural  
28  
29 issues. *Neuropsychological Rehabilitation* 2009;**19**(6):955-70.  
30  
31 28. de Klerk G. Cross-Cultural Testing In: Born M, Foxcroft, C.D., Butter, R., ed. *Online Readings in*  
32  
33 *Testing and Assessment: International Test Commission*, 2008.  
34  
35 29. Kersten P, Dudley M, Nayar S, et al. Cross-cultural acceptability and utility of the strengths and  
36  
37 difficulties questionnaire: views of families. *BMC Psychiatry* 2016;**16**(1):347.  
38  
39 30. Andrich D. *Rasch models for measurement series: quantitative applications in the social sciences*  
40  
41 *no. 68*. London: Sage Publications, 1988.  
42  
43 31. Linacre JM. Rasch Power Analysis: Size vs. Significance: Infit and Outfit Mean-Square and  
44  
45 Standardized Chi-Square Fit Statistic. *Rasch Meas Trans* 2003;**17**(1):918.  
46  
47 32. Tennant A, Pallant JF. The Root Mean Square Error of Approximation (RMSEA) as a  
48  
49 supplementary statistic to determine fit to the Rasch model with large sample sizes. *Rasch*  
50  
51 *Meas Trans* 2012;**25**(4):1348-9.  
52  
53 33. Linacre JM. Sample size and item calibration [or Person Measure] stability. *Rasch Measurement*  
54  
55 *Transactions* 1994;**7**(4):328.  
56  
57 34. Wright BD, Tennant A. Sample size again. *Rasch Measurement Transactions* 1996;**9**(4):468.  
58  
59  
60



- 1  
2  
3 35. Charter RA, Feldt LS. Confidence intervals for true scores: Is there a correct approach? *Journal of*  
4  
5 *Psychoeducational Assessment* 2001;**19**(4):350-64.  
6  
7 36. Nunnally JC, Bernstein IH. *Psychometric theory (3rd ed.)*. New York: McGraw-Hill, 1994.  
8  
9 37. RUMM2030 [program]: RUMM Laboratory Pty Ltd., 2009.  
10  
11 38. Marais I, Andrich D. Effects of varying magnitude and patterns of response dependence in the  
12  
13 *unidimensional Rasch model*. *Journal of Applied Measurement* 2008;**9**(2):105-24.  
14  
15 39. Wainer H, Kiely G. Item clusters and computer adaptive testing: A case for testlets. *J Educ*  
16  
17 *measurement* 1987;**24**:185-202.  
18  
19 40. Grimby G. Useful reporting of DIF. *Rasch Measurement Transactions* 1998;**12**(3):651.  
20  
21 41. Holland PW, Wainer H. *Differential Item Functioning*. NJ: Hillsdale. Lawrence Erlbaum, 1993.  
22  
23 42. Smith EV. Detecting and evaluation the impact of multidimensionality using item fit statistics and  
24  
25 *principal component analysis of residuals*. *Journal of Applied Measurement* 2002;**3**:205-31.  
26  
27 43. Tennant A, Pallant JF. Unidimensionality matters! (a tale of two Smiths?). *Rasch Measurement*  
28  
29 *Transactions* 2006;**20**:1048-51.  
30  
31 44. Wright BD. Reliability and separation. *Rasch Measurement Transactions* 1996;**9**(4):472.  
32  
33 45. Sheng Y, Sheng Z. Is Coefficient Alpha Robust to Non-Normal Data? *Frontiers in Psychology*  
34  
35 2012;**34**(1):1-13.  
36  
37 46. Wright BD. Separation, Reliability and Skewed Distributions: Statistically Different Levels of  
38  
39 *Performance*. *Rasch Meas Trans* 2001;**14**(4):786.  
40  
41 47. Andrich D. Rating formulation for ordered response categories. *Psychometrika* 1978;**43**(4):561-  
42  
43 73.  
44  
45 48. Masters G. A Rasch model for partial credit scoring. *Psychometrika* 1982;**47**:149-74.  
46  
47 49. Stone LL, Otten R, Engels RC, et al. Psychometric properties of the parent and teacher versions of  
48  
49 *the strengths and difficulties questionnaire for 4- to 12-year-olds: a review*. *Clinical Child*  
50  
51 *And Family Psychology Review* 2010;**13**(3):254-74.  
52  
53 50. Richter J, Sagatun A, Heyerdahl S, et al. The Strengths and Difficulties Questionnaire (SDQ) -  
54  
55 *Self-Report*. An analysis of its structure in a multiethnic urban adolescent sample. *Journal of*  
56  
57 *Child Psychology and Psychiatry and Allied Disciplines* 2011;**52**(9):1002-11.  
58  
59  
60

- 1  
2  
3 51. Ortuño-Sierra J, Fonseca-Pedrero E, Aritio-Solana R, et al. New evidence of factor structure and  
4 measurement invariance of the SDQ across five European nations. *European Child and*  
5 *Adolescent Psychiatry* 2015;**24**(12):1523-34.  
6  
7  
8  
9 52. Goodman A, Patel V, Leon DA. Why do British Indian children have an apparent mental health  
10 advantage? *Journal of Child Psychology and Psychiatry and Allied Disciplines*  
11 *2010*;**51**(10):1171-83.  
12  
13  
14 53. Goodman A, Heiervang E, Fleitlich-Bilyk B, et al. Cross-national differences in questionnaires do  
15 not necessarily reflect comparable differences in disorder prevalence. *Social Psychiatry And*  
16 *Psychiatric Epidemiology* 2012;**47**(8):1321-31.  
17  
18  
19 54. de Vries PJ, Davids EL, Mathews C, et al. Measuring adolescent mental health around the globe:  
20 psychometric properties of the self-report Strengths and Difficulties Questionnaire in South  
21 Africa, and comparison with UK, Australian and Chinese data. *Epidemiology and Psychiatric*  
22 *Sciences* 2017:1-12.  
23  
24  
25 55. Kersten P, Vandal AC, Elder H, et al. Concurrent Validity of the Strengths and Difficulties  
26 Questionnaire in an Indigenous Pre-School Population. *Journal of Child and Family Studies*  
27 *2017*;**26**(8):2126-35.  
28  
29  
30 56. Williamson A, Redman S, Dadds M, et al. Acceptability of an emotional and behavioural  
31 screening tool for children in Aboriginal Community Controlled Health Services in urban  
32 NSW. *Australian and New Zealand Journal of Psychiatry* 2010;**44**(10):894-900.  
33  
34  
35 57. Beaton DE, Bombardier C, Guillemin F, et al. Guidelines for the process of cross-cultural  
36 adaptation of self-report measures. *Spine* 2000;**25**(24):3186-91.  
37  
38  
39 58. Samad L, Hollis C, Prince M, et al. Child and adolescent psychopathology in a developing  
40 country: Testing the validity of the Strengths and Difficulties Questionnaire (Urdu version).  
41 *International Journal Of Methods In Psychiatric Research* 2005;**14**(3):158-66.  
42  
43  
44 59. Thabet AA, Stretch D, Vostanis P. Child mental health problems in Arab children: Application of  
45 the strengths and difficulties questionnaire. *International Journal of Social Psychiatry*  
46 *2000*;**46**(4):266-80.  
47  
48  
49  
50  
51  
52  
53  
54  
55  
56  
57  
58  
59  
60

- 1  
2  
3 60. Lane C. Adult literacy and numeracy in New Zealand – A regional analysis. Perspectives from the  
4  
5 Adult Literacy and Life Skills Survey, 2012.  
6  
7 61. Statistics New Zealand. 2013 Census QuickStats about culture and identity. Available from  
8  
9 <http://www.stats.govt.nz>. Wellington, New Zealand, 2014.  
10  
11 62. The Advisory Group on Conduct Problems. Conduct problems. Best practice report. Wellington,  
12  
13 2009.  
14  
15 63. Statistics New Zealand. Te Kupenga, 2013.  
16  
17 64. Hedley C, Thompson S, Morris Mathews K, et al. The B4 School Check behaviour measures:  
18  
19 Findings from the Hawke's Bay evaluation. *Nursing Praxis in New Zealand* 2012;**28**(3):13-23.  
20  
21  
22  
23  
24  
25  
26  
27  
28  
29  
30  
31  
32  
33  
34  
35  
36  
37  
38  
39  
40  
41  
42  
43  
44  
45  
46  
47  
48  
49  
50  
51  
52  
53  
54  
55  
56  
57  
58  
59  
60

1  
2  
3  
4  
5  
6  
7  
8  
9  
10  
11  
12  
13  
14  
15  
16  
17  
18  
19  
20  
21  
22  
23  
24  
25  
26  
27  
28  
29  
30  
31  
32  
33  
34  
35  
36  
37  
38  
39  
40  
41  
42  
43  
44  
45  
46  
47  
48  
49  
50  
51  
52  
53  
54  
55  
56  
57  
58  
59  
60



Figure 1. Item Characteristics Curves for items from the Strengths and Difficulties Questionnaire (parents, n=1,000)

209x297mm (300 x 300 DPI)



Figure 2. Person-item-threshold maps Strengths and Difficulties Questionnaire (parents, n=1,000)

209x297mm (300 x 300 DPI)

1  
2  
3  
4  
5  
6  
7  
8  
9  
10  
11  
12  
13  
14  
15  
16  
17  
18  
19  
20  
21  
22  
23  
24  
25  
26  
27  
28  
29  
30  
31  
32  
33  
34  
35  
36  
37  
38  
39  
40  
41  
42  
43  
44  
45  
46  
47

STROBE Statement—checklist of items that should be included in reports of observational studies

|                      | Item No | Recommendation                                                                                                                                                                                                                                                                                                                                                                                                                                                                 | Page number      |
|----------------------|---------|--------------------------------------------------------------------------------------------------------------------------------------------------------------------------------------------------------------------------------------------------------------------------------------------------------------------------------------------------------------------------------------------------------------------------------------------------------------------------------|------------------|
| Title and abstract   | 1       | (a) Indicate the study’s design with a commonly used term in the title or the abstract                                                                                                                                                                                                                                                                                                                                                                                         | 2                |
|                      |         | (b) Provide in the abstract an informative and balanced summary of what was done and what was found                                                                                                                                                                                                                                                                                                                                                                            | 2                |
| <b>Introduction</b>  |         |                                                                                                                                                                                                                                                                                                                                                                                                                                                                                |                  |
| Background/rationale | 2       | Explain the scientific background and rationale for the investigation being reported                                                                                                                                                                                                                                                                                                                                                                                           | 4-6              |
| Objectives           | 3       | State specific objectives, including any prespecified hypotheses                                                                                                                                                                                                                                                                                                                                                                                                               | 6                |
| <b>Methods</b>       |         |                                                                                                                                                                                                                                                                                                                                                                                                                                                                                |                  |
| Study design         | 4       | Present key elements of study design early in the paper                                                                                                                                                                                                                                                                                                                                                                                                                        | 2, 6             |
| Setting              | 5       | Describe the setting, locations, and relevant dates, including periods of recruitment, exposure, follow-up, and data collection                                                                                                                                                                                                                                                                                                                                                | 6-8              |
| Participants         | 6       | (a) <i>Cohort study</i> —Give the eligibility criteria, and the sources and methods of selection of participants. Describe methods of follow-up<br><br><i>Case-control study</i> —Give the eligibility criteria, and the sources and methods of case ascertainment and control selection. Give the rationale for the choice of cases and controls<br><br><i>Cross-sectional study</i> —Give the eligibility criteria, and the sources and methods of selection of participants | N/A<br><br><br>7 |
|                      |         | (b) <i>Cohort study</i> —For matched studies, give matching criteria and number of exposed and unexposed<br><br><i>Case-control study</i> —For matched studies, give matching criteria and the number of controls per case                                                                                                                                                                                                                                                     | N/A              |
| Variables            | 7       | Clearly define all outcomes, exposures, predictors, potential confounders, and effect modifiers. Give diagnostic criteria, if applicable                                                                                                                                                                                                                                                                                                                                       | N/A              |

|                              |    |                                                                                                                                                                                                                                                                                                                   |      |
|------------------------------|----|-------------------------------------------------------------------------------------------------------------------------------------------------------------------------------------------------------------------------------------------------------------------------------------------------------------------|------|
| Data sources/<br>measurement | 8* | For each variable of interest, give sources of data and details of methods of assessment (measurement). Describe comparability of assessment methods if there is more than one group                                                                                                                              | 8    |
| Bias                         | 9  | Describe any efforts to address potential sources of bias                                                                                                                                                                                                                                                         | 7    |
| Study size                   | 10 | Explain how the study size was arrived at                                                                                                                                                                                                                                                                         | 8    |
| Quantitative variables       | 11 | Explain how quantitative variables were handled in the analyses. If applicable, describe which groupings were chosen and why                                                                                                                                                                                      | 7-8  |
| Statistical methods          | 12 | (a) Describe all statistical methods, including those used to control for confounding                                                                                                                                                                                                                             | 8-11 |
|                              |    | (b) Describe any methods used to examine subgroups and interactions                                                                                                                                                                                                                                               | 8-11 |
|                              |    | (c) Explain how missing data were addressed                                                                                                                                                                                                                                                                       | 7    |
|                              |    | (d) <i>Cohort study</i> —If applicable, explain how loss to follow-up was addressed<br><br><i>Case-control study</i> —If applicable, explain how matching of cases and controls was addressed<br><br><i>Cross-sectional study</i> —If applicable, describe analytical methods taking account of sampling strategy | N/A  |
|                              |    | (e) Describe any sensitivity analyses                                                                                                                                                                                                                                                                             | N/A  |

Continued on next page

| <b>Results</b>    |     |                                                                                                                                                                                                              |       |
|-------------------|-----|--------------------------------------------------------------------------------------------------------------------------------------------------------------------------------------------------------------|-------|
| Participants      | 13* | (a) Report numbers of individuals at each stage of study—eg numbers potentially eligible, examined for eligibility, confirmed eligible, included in the study, completing follow-up, and analysed            | 11    |
|                   |     | (b) Give reasons for non-participation at each stage                                                                                                                                                         | N/A   |
|                   |     | (c) Consider use of a flow diagram                                                                                                                                                                           | N/A   |
| Descriptive data  | 14* | (a) Give characteristics of study participants (eg demographic, clinical, social) and information on exposures and potential confounders                                                                     | 11    |
|                   |     | (b) Indicate number of participants with missing data for each variable of interest                                                                                                                          | 7     |
|                   |     | (c) <i>Cohort study</i> —Summarise follow-up time (eg, average and total amount)                                                                                                                             | N/A   |
| Outcome data      | 15* | <i>Cohort study</i> —Report numbers of outcome events or summary measures over time                                                                                                                          | N/A   |
|                   |     | <i>Case-control study</i> —Report numbers in each exposure category, or summary measures of exposure                                                                                                         | N/A   |
|                   |     | <i>Cross-sectional study</i> —Report numbers of outcome events or summary measures                                                                                                                           | N/A   |
| Main results      | 16  | (a) Give unadjusted estimates and, if applicable, confounder-adjusted estimates and their precision (eg, 95% confidence interval). Make clear which confounders were adjusted for and why they were included | N/A   |
|                   |     | (b) Report category boundaries when continuous variables were categorized                                                                                                                                    | N/A   |
|                   |     | (c) If relevant, consider translating estimates of relative risk into absolute risk for a meaningful time period                                                                                             | N/A   |
| Other analyses    | 17  | Report other analyses done—eg analyses of subgroups and interactions, and sensitivity analyses                                                                                                               | N/A   |
| <b>Discussion</b> |     |                                                                                                                                                                                                              |       |
| Key results       | 18  | Summarise key results with reference to study objectives                                                                                                                                                     | 15    |
| Limitations       | 19  | Discuss limitations of the study, taking into account sources of potential bias or imprecision. Discuss both direction and magnitude of any potential bias                                                   | 19    |
| Interpretation    | 20  | Give a cautious overall interpretation of results considering objectives, limitations, multiplicity of analyses, results from                                                                                | 16-19 |



|                          |    |                                                                                                                                                               |    |
|--------------------------|----|---------------------------------------------------------------------------------------------------------------------------------------------------------------|----|
|                          |    | similar studies, and other relevant evidence                                                                                                                  |    |
| Generalisability         | 21 | Discuss the generalisability (external validity) of the study results                                                                                         | 19 |
| <b>Other information</b> |    |                                                                                                                                                               |    |
| Funding                  | 22 | Give the source of funding and the role of the funders for the present study and, if applicable, for the original study on which the present article is based | 3  |

\*Give information separately for cases and controls in case-control studies and, if applicable, for exposed and unexposed groups in cohort and cross-sectional studies.

**Note:** An Explanation and Elaboration article discusses each checklist item and gives methodological background and published examples of transparent reporting. The STROBE checklist is best used in conjunction with this article (freely available on the Web sites of PLoS Medicine at <http://www.plosmedicine.org/>, Annals of Internal Medicine at <http://www.annals.org/>, and Epidemiology at <http://www.epidem.com/>). Information on the STROBE Initiative is available at [www.strobe-statement.org](http://www.strobe-statement.org).
